# Supplementary material for: Genome-Wide Transcriptome Analysis Reveals that Cadmium Stress Signaling Controls the Expression of Genes in Drought Stress Signal Pathways in Rice
Source: PLoS One. 2014 May 9;9(5):e96946. doi: 10.1371/journal.pone.0096946 (PMC4016200; doi:10.1371/journal.pone.0096946)
Supplement: Table S2 — Expression (RPKM value) of Ca-responsive transcripts. (XLS) [file pone.0096946.s008.xls]

## Sheet: Table S2
Table S2. Expression (RPKM value) of Ca-responsive transcripts.
		Root			Shoot			Location of Cufflinks transcripts
		0 h	1 h	24 h	0 h	1 h	24 h	Chrmosome	Start	End
Upregulated transcripts in roots at 1h
	Os01t0764000-03	2886.56	3420.61	1471.92	245.46	273.43	404.87	-	-	-
	Os01t0764000-01	2603.42	3095.58	1328.86	224.09	254.51	379.32	-	-	-
	Os12t0571100-01	578.74	2820.86	4778.3	4.57	4.36	256.27	-	-	-
	Os01t0764050-00	2443.97	2751.62	1298.7	203.7	227.14	317.99	-	-	-
	Os12t0632000-01	1936.32	2487.51	1468.05	3089.92	5065.88	1492.42	-	-	-
	Os11t0167800-01	1757.05	2154.46	419.15	1966.48	2136.4	348.44	-	-	-
	Os11t0704500-01	1436.58	2138.63	2225.33	829.83	671.61	2866.05	-	-	-
	Os12t0555000-01	948.98	1873.54	132.93	18.04	9.33	421.44	-	-	-
	Os03t0285700-01	1703	1835.81	1063.88	668.67	589.76	466.01	-	-	-
	Os05t0135750-00	1183.35	1671.14	914.42	227.04	646.1	276.09	-	-	-
	Os09t0484200-01	684.19	1571.24	348.99	26.11	30.19	34.34	-	-	-
	Os01t0256500-01	1192.91	1403.2	2711.16	403.34	442.41	815.69	-	-	-
	Os09t0484200-02	830.41	1381.38	380.14	29.2	26.6	30.63	-	-	-
	Os02t0626100-01	898.05	1360.04	914.98	180.74	830.66	307.84	-	-	-
	Os04t0559700-01	648.85	1214.13	341.15	216.25	334.51	742.3	-	-	-
	Os02t0601300-01	920.04	1190.68	340.91	77.96	72.68	105.87	-	-	-
	Os02t0666200-02	743.45	1154.03	298.48	478.83	324.09	997	-	-	-
	Os08t0482700-01	538	1121.9	1317.97	197.61	266.18	715.5	-	-	-
	Os04t0656100-04	902.21	1096.64	512.27	508.97	678.71	806.74	-	-	-
	Os02t0666200-01	705.67	1092.26	282.54	453.84	307.31	944.28	-	-	-
	Os06t0580100-01	934.15	1042.27	597.62	1388.68	1421.88	1043.26	-	-	-
	Os11t0704525-00	645.49	1040.65	1140.14	428.94	309.39	1069.87	-	-	-
	Os04t0656100-03	789.99	1012.74	450.43	445.74	622.86	732.78	-	-	-
	Os10t0191300-01	508.97	987.8	1160.29	1.95	0.23	0.86	-	-	-
	Os01t0803200-02	712.86	929.25	520.27	1574.73	527.77	695.81	-	-	-
	Os02t0669100-01	165.42	849	510.83	29.77	79.67	93.02	-	-	-
	Os02t0543000-05	616.89	842.16	214.07	72.82	85.03	139.52	-	-	-
	Os04t0656100-01	576.71	838.15	334.52	324.84	505.83	599.03	-	-	-
	Os02t0543000-04	598.02	823.25	208.58	70.45	82.11	137.06	-	-	-
	Os01t0550300-02	412.4	812.5	563.87	519.6	499.64	503.44	-	-	-
	Os01t0550300-01	422.34	809.12	574.04	529.1	501.57	510.16	-	-	-
	Os03t0273800-01	357.95	805.95	725.83	71.18	138.25	316.37	-	-	-
	Os04t0559750-00	202.61	788.99	149.9	100.9	209.76	407.57	-	-	-
	Os03t0276500-01	213.99	768.08	332.8	148.73	519.62	1353.28	-	-	-
	Os06t0194900-04	290.82	766.25	166.06	77.16	102.27	236.22	-	-	-
	Os01t0905800-03	657.95	763.1	235.96	106.36	120.7	162.78	-	-	-
	Os01t0926300-01	581.91	748.25	397.59	137.03	174.99	390.15	-	-	-
	Os01t0905800-01	641.5	723.81	227.43	103.6	114.86	157.5	-	-	-
	Os02t0628800-01	395.93	718.39	1135.59	356.72	369.6	1081.61	-	-	-
	Os03t0146100-05	440.35	715.82	137.54	395.88	357.64	388.42	-	-	-
	Os02t0823100-01	465.66	703.25	246.29	31.41	13.87	42.94	-	-	-
	Os06t0215600-01	113.71	701.67	463.03	1.36	1.11	51.06	-	-	-
	Os06t0194900-02	255.25	700.71	146.32	66.28	92.6	214.54	-	-	-
	Os07t0694700-01	637.54	699.77	561.47	1238.31	886.17	1251.88	-	-	-
	Os03t0401300-02	616.61	696.41	145.58	17.06	29.31	7.42	-	-	-
	Os06t0194900-01	252.39	685.31	145	65.53	90.83	210.04	-	-	-
	Os05t0138300-03	446.44	670.82	1569.13	615.65	487.79	1035.53	-	-	-
	Os04t0556300-02	466.35	661.57	757.83	526.4	452.33	287.39	-	-	-
	Os03t0401300-01	400.27	661.44	88.03	10.05	28.41	8.74	-	-	-
	Os04t0650000-03	448.65	660.81	876.58	848.25	677.52	1827.23	-	-	-
	Os01t0905800-02	303.51	659.48	99.31	46.65	96.45	142.91	-	-	-
	Os02t0543000-01	480.12	659.23	167.77	59.13	70.29	111.29	-	-	-
	Os02t0543000-02	534.82	658.26	188.67	57.65	66.63	80.12	-	-	-
	Os08t0482700-02	317.81	657.63	809.89	114.97	148.47	413.15	-	-	-
	Os02t0543000-03	544.86	657.43	188.66	58.33	67.09	80.39	-	-	-
	Os04t0556300-01	355.73	655.42	596.59	423.17	439.15	285.64	-	-	-
	Os02t0244700-04	430.8	615.51	260.32	85.59	84.54	195.89	-	-	-
	Os06t0215750-00	93.68	614.74	395.16	1.06	0.97	37.41	-	-	-
	Os03t0655400-01	371.37	613.25	265.48	3054.9	3334	554.14	-	-	-
	Os01t0803200-01	467.97	612.29	343.45	1030.78	346.14	465.51	-	-	-
	Os04t0650000-02	331.51	596.47	684.53	592.9	602.78	2109.17	-	-	-
	Os03t0146100-01	291.9	595.73	95.92	290.9	303.03	343.63	-	-	-
	Os03t0107300-01	402.1	592.46	43.9	0.52	0.13	0.02	-	-	-
	Os03t0103100-01	189.24	585.85	49.08	0.74	0.29	0.26	-	-	-
	Os01t0323600-01	410.27	585.6	429.74	60.5	307.28	472.37	-	-	-
	Os05t0363200-01	321.44	576.55	239.51	98.4	269.79	116.41	-	-	-
	Os03t0327600-01	444.35	572.49	262.29	13.34	7.17	8.47	-	-	-
	Os01t0323775-00	420.1	569.22	439.68	62.3	300.57	473.71	-	-	-
	Os03t0146100-03	266.13	556.58	90.37	267.93	287.14	316.7	-	-	-
	Os08t0557600-01	250.98	555.22	479.53	42.71	58.05	158.3	-	-	-
	Os07t0635900-01	318.99	553.81	222.29	194.83	189.85	63.05	-	-	-
	Os03t0136900-02	393.44	550.31	445.33	115.64	122.44	205.59	-	-	-
	Os04t0628100-02	184.86	547.49	888.33	277.94	392.85	289.31	-	-	-
	Os03t0223400-01	38.28	545.11	61.88	25.64	27.08	11.71	-	-	-
	Os01t0147900-01	483.82	541.78	198.29	931.67	842.01	352.47	-	-	-
	Os06t0194900-03	190.68	541.19	112.39	50.11	70.7	167.61	-	-	-
	Os02t0582900-01	182.62	525.38	9.36	0.29	0.18	0.12	-	-	-
	Os07t0638400-01	394.58	512.13	344.6	2.38	2.27	30.12	-	-	-
	Os04t0462500-01	353.48	511.25	282.57	82.35	183.32	132.96	-	-	-
	Os05t0119300-01	208.23	508.06	604.46	1065.03	817.43	474.32	-	-	-
	Os01t0926350-00	419.07	504.38	296.61	99.05	115.96	289.48	-	-	-
	Os11t0671000-01	398.08	503.52	281.66	1116.83	384.08	1479.29	-	-	-
	Os04t0462500-05	370.45	502.99	290.9	84.69	182.49	127.73	-	-	-
	Os07t0622200-01	340.39	501.23	653.44	116.34	225.65	296.02	-	-	-
	Os05t0320750-00	319.02	494.46	599.05	65.59	158.52	225.66	-	-	-
	Os12t0555200-01	310.33	490.92	45.04	16.54	6.6	212.52	-	-	-
	Os01t0723400-03	390.5	490.68	169.23	343.7	304.11	889.36	-	-	-
	Os10t0528400-01	226.2	486.9	1216.37	11.29	15.56	234.18	-	-	-
	Os05t0498400-01	359.43	474.19	559.13	783.33	648.91	250.99	-	-	-
	Os06t0215900-02	167.68	471.41	475.13	5.5	6.03	88.79	-	-	-
	Os01t0975900-01	137.94	471.17	62.28	274.6	54.99	120.89	-	-	-
	Os07t0274700-01	398.75	470.92	726.77	57.3	65.09	229.51	-	-	-
	Os06t0215900-01	167.18	465.45	472.68	5.46	6.01	87.18	-	-	-
	Os05t0247100-02	328.78	451.87	1722.85	83.28	185.3	3739.74	-	-	-
	Os01t0558600-01	384.2	451.09	602.29	347.12	310.88	795.76	-	-	-
	Os02t0256200-01	221.7	448.4	491.26	2.66	5.68	13.82	-	-	-
	Os08t0191700-03	391.45	442.73	255.07	1441.63	984.72	994.4	-	-	-
	Os08t0557600-02	288.65	441.93	580.69	54.33	50.49	92.82	-	-	-
	Os01t0723400-01	334.27	439.18	144.31	290.98	270.1	809.9	-	-	-
	Os07t0185900-01	333.38	438.09	768.61	235.12	122.79	287.66	-	-	-
	Os07t0188800-01	325.62	437.8	190.01	132.89	137.91	322.71	-	-	-
	Os08t0205400-01	346.08	433.03	648.11	263.69	193.46	477.78	-	-	-
	Os07t0186000-01	319.02	432.09	2026.76	1623.53	800.1	1424.15	-	-	-
	Os06t0195025-00	118.42	432.01	80.57	33.08	55.53	145.99	-	-	-
	Os03t0791800-01	395.49	430.22	235.51	460.42	444.79	230.38	-	-	-
	Os08t0191700-01	381.32	425.03	245.66	1389.3	946.65	948.37	-	-	-
	Os02t0525900-03	249.08	423.37	330.01	38.09	49.09	107.56	-	-	-
	Os03t0319300-01	316.05	420.8	220.86	227.03	451.55	176.34	-	-	-
	Os05t0310500-01	356.98	419.3	420.99	503.16	400.75	615.73	-	-	-
	Os01t0191700-01	37.06	419.23	83.54	51.07	54.28	99.97	-	-	-
	Os12t0227400-01	321.53	418.35	32.28	0.35	0.13	0.01	-	-	-
	Os03t0710850-00	345.39	416.31	147.66	166.73	255.75	319.43	-	-	-
	Os05t0320700-01	235.35	413.2	413.78	43.63	133.05	208.67	-	-	-
	Os02t0244700-02	234.07	413.02	144.94	41.88	51.45	134.62	-	-	-
	Os04t0650000-01	127.02	411.49	329.76	189.09	400.49	1713.39	-	-	-
	Os03t0146200-01	219.5	411.49	70.61	206.92	206	184.11	-	-	-
	Os06t0215925-00	150.3	409.32	419.16	5.03	5.16	62.49	-	-	-
	Os01t0723400-02	307.53	408.56	133.4	268.82	250.19	752.92	-	-	-
	Os04t0244800-01	71.17	408.22	264.15	142.66	279.58	805.18	-	-	-
	Os10t0528300-01	360.55	403.98	1575.05	13.87	8.74	192.22	-	-	-
	Os10t0528651-00	143.06	403.89	940.78	7.97	12.12	222.95	-	-	-
	Os02t0629200-02	197.88	403.02	29.86	102.8	63.96	118.69	-	-	-
	Os03t0401333-00	181.78	395.08	41.38	4.64	16.85	5.18	-	-	-
	Os06t0131001-00	252.91	391.92	752.02	384.63	1010.67	459.85	-	-	-
	Os01t0975900-02	119.44	385.33	53.41	248.13	47.14	86.83	-	-	-
	Os04t0462500-04	280.12	383.18	221.84	63.51	137.75	97.86	-	-	-
	Os03t0136900-01	220.89	381.41	249.96	54.39	74.28	160.47	-	-	-
	Os07t0661400-01	128.12	378.88	327.98	212.67	153.64	101.58	-	-	-
	Os11t0184900-02	52.77	376.13	154.22	37.14	53.53	107.65	-	-	-
	Os06t0130900-00	312.48	372.03	855.3	463.56	973.17	478.95	-	-	-
	Os07t0622250-00	171.68	371.97	327.17	62.22	167.25	222.59	-	-	-
	Os04t0683700-01	202.13	371.55	180.4	32.17	32.93	764.74	-	-	-
	Os06t0727200-01	312.83	369.59	281.78	125.85	118.35	202.45	-	-	-
	Os02t0626400-03	268.74	367.78	325.87	64.89	256.43	282.02	-	-	-
	Os05t0129300-02	306.85	365.17	393.62	130.14	67.31	355.7	-	-	-
	Os06t0727200-02	317.26	364.39	284.28	126.92	116.44	197.4	-	-	-
	Os02t0626400-02	250.58	364.24	305.98	60.04	257.45	282.45	-	-	-
	Os05t0542200-03	95.65	363.76	104.89	38.73	47.52	137.45	-	-	-
	Os06t0239200-00	94.16	361.97	1115.43	346.63	121.04	291.11	-	-	-
	Os03t0194900-01	168.1	359.45	1049.12	23.82	32.18	333.12	-	-	-
	Os11t0255500-01	109.01	359.42	202.24	0.28	0.11	0.48	-	-	-
	Os09t0434500-01	307.8	357.4	97.82	739.95	620.57	236.55	-	-	-
	Os03t0194900-03	169.84	356.85	1048.51	24.18	31.84	332.14	-	-	-
	Os02t0525900-02	182.49	355.17	252.67	26.63	38.8	87.03	-	-	-
	Os02t0752800-02	174.04	353.84	172.76	201.75	293.71	293.37	-	-	-
	Os07t0192000-01	82.35	351.24	967.45	9.86	10.23	100.2	-	-	-
	Os03t0749300-02	285.11	350.21	524.53	99.54	334.67	632.22	-	-	-
	Os03t0743900-01	217.5	350.21	350.75	52.58	81.46	95.2	-	-	-
	Os02t0817700-01	202.17	349.86	349.48	173.54	209.45	718.14	-	-	-
	Os05t0343400-01	100.42	347.71	454.14	275.83	131.38	506.33	-	-	-
	Os09t0572700-02	71.72	345.68	378.28	34.87	50.04	390.59	-	-	-
	Os01t0639900-01	150.49	345.63	118.68	5157.55	5169.87	207.35	-	-	-
	Os02t0244700-01	176.84	340.19	109.08	30.69	41.92	110.24	-	-	-
	Os01t0182600-01	315	339.44	199.3	341.47	399.27	51.86	-	-	-
	Os10t0536450-00	39.62	338.14	118.42	50.67	125.07	572.15	-	-	-
	Os01t0182600-03	317.66	336.71	201.82	351.05	401.18	51.45	-	-	-
	Os02t0666250-00	216.66	334.84	88.53	143.21	86.02	182.49	-	-	-
	Os04t0521100-01	95.1	333.16	16.95	0.26	0.11	0.09	-	-	-
	Os06t0111550-00	273.15	332.12	144.17	92.31	124.58	204.21	-	-	-
	Os07t0287400-01	246.53	327.91	17.56	1.35	0.43	0.11	-	-	-
	Os01t0817700-01	228.1	327.44	121.55	206.87	197.82	76.16	-	-	-
	Os02t0525900-01	165.94	325.63	230.23	24.25	35.76	80.28	-	-	-
	Os02t0181300-01	48.93	325.31	280.76	147.97	71.37	116.55	-	-	-
	Os06t0133800-01	295.72	324.11	216.29	520.82	750.2	267.74	-	-	-
	Os01t0817700-02	230.82	323.66	123.77	212.35	195.61	74.73	-	-	-
	Os02t0768300-01	155.27	322	176.63	0.83	0.23	0.03	-	-	-
	Os07t0106200-03	130.29	321.56	232.94	26.05	44.34	342.44	-	-	-
	Os10t0527800-01	54.73	319.9	894.97	9.22	7.6	426.97	-	-	-
	Os02t0629200-01	215.81	318.86	28.87	93.8	56.39	59.71	-	-	-
	Os04t0462500-03	225.67	318.21	181.46	51.49	113.88	80.23	-	-	-
	Os02t0593700-03	213.09	317.7	545.17	143.15	177.75	475.67	-	-	-
	Os02t0626400-01	195.61	316.93	257.78	46.59	227.52	250.47	-	-	-
	Os05t0405000-02	267.01	316.91	69.62	80.95	132.92	234.54	-	-	-
	Os02t0593700-02	187.96	315.29	495.93	123.45	172.42	477.85	-	-	-
	Os02t0752800-01	158.42	314.07	159.49	181.3	258.83	319.08	-	-	-
	Os04t0434800-02	263.93	313.21	144.11	112.15	87.7	85.65	-	-	-
	Os04t0462500-02	220.38	312.42	177.74	50.27	111.59	78.64	-	-	-
	Os08t0126350-00	194.47	312.11	186.37	174.47	183.33	226.75	-	-	-
	Os09t0362800-02	266.1	311.45	114.22	36.26	26.27	19.42	-	-	-
	Os04t0605100-01	98.74	310.12	222.2	90.61	50.62	47.15	-	-	-
	Os03t0368900-01	209.97	309.82	50.08	3.58	8.81	0.52	-	-	-
	Os03t0787300-01	144.82	309.27	248.8	187.67	317.53	949.31	-	-	-
	Os02t0102300-01	122.04	307.7	133.46	18.87	21.71	7.03	-	-	-
	Os07t0106200-01	100.7	307.69	197.85	20.84	40.18	341.99	-	-	-
	Os06t0131300-00	252.59	304.81	299.42	22.12	35.43	150	-	-	-
	Os01t0327400-01	152.33	303.43	102.35	21.84	86.05	57.37	-	-	-
	Os02t0629266-00	86.96	302.93	16.54	59.61	44.07	108.08	-	-	-
	Os03t0648400-01	223.34	301.32	193.39	43.24	91.11	349.48	-	-	-
	Os07t0429700-01	151.9	300.7	10.26	0.04	0.18	0.04	-	-	-
	Os01t0884300-01	114.26	300.69	486.51	301.48	155.66	739.06	-	-	-
	Os06t0131350-00	244.04	299.93	293.68	20.98	34.41	153.26	-	-	-
	Os07t0150700-01	221.57	299.76	221.44	30.24	37.96	55.32	-	-	-
	Os03t0242300-01	33.76	299.76	38.29	24.95	91.3	6.43	-	-	-
	Os03t0757950-00	191.55	296.63	120.15	55.55	157.45	134.55	-	-	-
	Os01t0866133-00	71.31	296.51	103.98	71.97	186.89	201.91	-	-	-
	Os09t0399800-01	167.95	294.91	109.6	0.48	0.11	1.19	-	-	-
	Os05t0594100-02	115.92	293.99	319.56	104.97	111.63	347.04	-	-	-
	Os03t0147400-02	249.68	293.12	344.59	219.35	323.22	327.63	-	-	-
	Os04t0628100-01	90.97	292.84	490.97	141.95	190.11	117.21	-	-	-
	Os01t0667200-02	211.52	291.06	311.57	110.15	96.35	82.2	-	-	-
	Os12t0190000-02	184.43	290.94	156.17	163.06	498.26	821.95	-	-	-
	Os01t0543100-01	201.13	290.69	31.71	1.34	0.54	0.68	-	-	-
	Os05t0542200-02	68.06	290.22	85.56	26.16	36.88	114.75	-	-	-
	Os03t0183000-01	167.63	290.18	121.24	3.49	9.54	93.42	-	-	-
	Os08t0113150-00	217.56	289.78	78.4	36.93	53.11	19.89	-	-	-
	Os05t0594100-01	107.71	287.49	295.87	97.69	107.48	329.97	-	-	-
	Os05t0405000-01	243.84	285.57	63.33	74.43	126.98	224.04	-	-	-
	Os02t0244850-00	144.6	285.14	90.87	24.46	34.89	90.63	-	-	-
	Os08t0127100-02	84.29	282.83	162.23	56.84	114.16	806.03	-	-	-
	Os02t0327000-02	192.85	282.46	309.75	56.67	39.77	113.3	-	-	-
	Os11t0147901-00	191.14	278.99	63.94	169.34	224.94	71.61	-	-	-
	Os07t0418500-01	84.01	278.85	78.11	5.28	3.45	14.94	-	-	-
	Os08t0127100-01	79.59	278.11	155.28	53.83	111.81	783.49	-	-	-
	Os02t0187800-01	139.2	277.42	146.35	23.02	64.89	51.52	-	-	-
	Os07t0635500-01	51.17	277.36	281.28	3.81	2.82	37.39	-	-	-
	Os01t0283300-02	153.01	274.55	815.37	68.54	158.62	123.04	-	-	-
	Os03t0757900-01	205.18	274.28	129.4	57.3	145.63	120.84	-	-	-
	Os07t0509800-01	56.19	273.76	236.08	23.52	69.77	176.01	-	-	-
	Os05t0542200-01	64.61	273.56	78.91	25.3	34.73	103.78	-	-	-
	Os02t0601350-00	173.4	272.62	74.34	16.12	14.9	26.67	-	-	-
	Os05t0119300-02	120.4	272.58	363.38	633.95	443.5	274.4	-	-	-
	Os02t0797600-03	191.36	271.46	192.45	151.52	192.92	146.2	-	-	-
	Os04t0434800-01	215.57	270.45	113.19	95.61	76.46	75.96	-	-	-
	Os02t0187800-02	140.06	269.9	151.4	24.72	62.1	51.36	-	-	-
	Os10t0530800-01	224.86	269.19	1168.72	9.07	7.65	138.43	-	-	-
	Os05t0151300-01	91.47	268.38	477.77	154.88	172.25	327.55	-	-	-
	Os01t0314800-01	168.33	268.1	1005.39	81.41	183.92	1338.34	-	-	-
	Os05t0494500-02	184.38	263.72	166.6	64.04	81.31	125.51	-	-	-
	Os11t0591800-01	177.19	263.16	922.16	0.83	0.15	2.59	-	-	-
	Os02t0593700-04	134.79	263.11	377.28	85.25	138.79	427.53	-	-	-
	Os07t0418500-02	76.95	262.91	74.4	4.95	3.25	14.15	-	-	-
	Os02t0525600-01	172.75	262.49	126.53	171.81	116.01	535.33	-	-	-
	Os10t0536400-01	40.68	261.12	122.43	44.63	97.3	239.16	-	-	-
	Os03t0203200-01	82.91	260.78	161.31	65.76	68.21	508.85	-	-	-
	Os07t0448100-01	199.25	260.5	30.14	1.1	0.54	1.07	-	-	-
	Os02t0593700-01	133.12	259.79	372.51	84.17	137.07	422.15	-	-	-
	Os02t0327000-01	178.28	259.3	288.58	52.69	36.9	104.83	-	-	-
	Os03t0103200-01	68.22	257.79	77.11	37.5	78.97	111.78	-	-	-
	Os03t0744600-01	135.38	256.81	170.56	176.83	195.53	108.18	-	-	-
	Os03t0787350-00	103.13	255.03	204.86	160.18	277.28	510.6	-	-	-
	Os04t0462550-00	121.45	255	103.22	30.97	90.65	80.72	-	-	-
	Os01t0246700-01	36.3	253.01	174.43	41.83	50.41	226.81	-	-	-
	Os09t0571200-01	80.73	252.5	135.09	15.31	14.97	78.18	-	-	-
	Os07t0539100-02	128.63	252.31	14.14	1.55	8.58	23.5	-	-	-
	Os11t0637501-00	125.82	251.74	151.82	90.42	111.27	298.68	-	-	-
	Os03t0764100-01	78.09	249.41	661.2	211.16	118.21	172.41	-	-	-
	Os02t0512000-01	94.57	248.16	40.4	0.28	0.56	0.37	-	-	-
	Os02t0244700-03	74.22	247.81	54.28	8.31	26.08	83	-	-	-
	Os01t0283300-01	137.98	246.8	732.08	61.74	142.72	110.69	-	-	-
	Os12t0190000-01	135.54	246.09	121.23	115.94	405.23	734.17	-	-	-
	Os05t0311500-01	43.62	246.05	148.91	72.49	145.38	54.28	-	-	-
	Os11t0184900-01	18.04	245.96	61.76	9.08	29.75	68.95	-	-	-
	Os03t0815100-01	77.54	245.93	505.74	196.85	142.7	352.97	-	-	-
	Os03t0749300-01	198.88	245.76	364.07	70	237.04	439.22	-	-	-
	Os03t0242350-01	15.47	245.16	24.82	11.47	66.14	5.02	-	-	-
	Os05t0138300-01	178.11	244.66	667.85	234.79	166.48	389.42	-	-	-
	Os03t0147550-00	192.09	244.49	271.84	163.12	259.65	262.15	-	-	-
	Os05t0137400-01	192.66	242.83	340.6	308.13	275.26	711.68	-	-	-
	CUFF.33373.1	70.08	242.41	35.5	0.32	0.15	0.13	chr09	11852937	11858617
	Os04t0178300-01	141.1	242.19	53.87	0.92	0.43	89.45	-	-	-
	Os03t0147400-01	192.57	240.29	269.01	162.32	258.57	270.65	-	-	-
	Os04t0521001-00	32.68	240.22	8.84	0.17	0.07	0.05	-	-	-
	Os02t0664000-01	141.01	239.72	238.91	305.71	226.28	145.19	-	-	-
	Os03t0734100-01	185.38	239.19	440.81	2.97	0.93	104.9	-	-	-
	Os02t0752701-01	88.33	237.01	107.41	89.16	190.86	260.36	-	-	-
	Os01t0667900-01	54.01	236.61	217.57	42.38	19.8	114.54	-	-	-
	Os08t0504700-01	153.74	236.34	603.25	302.79	208.05	360.41	-	-	-
	Os12t0567800-01	175.47	236.09	2315.41	0.75	1.61	155.54	-	-	-
	Os03t0390633-00	179.42	235.54	170.04	335.92	434.3	159.33	-	-	-
	Os02t0813500-01	174.89	234.04	223.35	113.82	115.98	335.29	-	-	-
	Os01t0866100-01	105.44	232.76	102.99	86.98	147.34	147.39	-	-	-
	Os01t0949750-00	94.31	231.63	667.86	20.38	12.21	105.78	-	-	-
	Os07t0539100-01	117.56	231.6	12.92	1.41	7.94	21.87	-	-	-
	Os01t0559750-01	166.54	231.42	762.11	290.66	550.45	267.23	-	-	-
	Os03t0764125-00	28.58	231.38	336.2	89.01	112.4	195.71	-	-	-
	Os08t0345700-02	118.57	231.27	67.58	12.41	23	58.5	-	-	-
	Os06t0175500-02	127.13	227.79	121.93	88.99	100.39	239.72	-	-	-
	Os01t0291500-01	129.55	227.13	30.82	2.16	8.83	2.66	-	-	-
	Os08t0480100-02	198.51	225.62	159.53	146.98	213.29	208.06	-	-	-
	Os01t0291500-02	143.8	224.88	32.45	2.34	8.59	2.79	-	-	-
	Os01t0784800-01	180.4	224.71	167.83	203.76	235.56	258.16	-	-	-
	Os07t0569100-01	45	223.14	190.47	157.23	186.96	155.74	-	-	-
	Os02t0572400-02	97.81	222.47	242.52	59.97	91.73	226.56	-	-	-
	Os03t0243100-01	98.03	222.14	135.41	62.42	122.86	221.81	-	-	-
	Os01t0667200-01	159.06	219.69	234	85.46	82.37	71.39	-	-	-
	Os01t0291733-00	74.46	219.39	20.66	1.47	8.26	2.8	-	-	-
	Os01t0916000-01	81.14	218.9	93.22	0.82	0.43	42.74	-	-	-
	Os01t0803300-01	144.5	218.63	183.68	1.66	1.23	0.82	-	-	-
	Os03t0154000-01	184.86	218.34	379.5	13.64	11.57	23.04	-	-	-
	Os06t0216350-00	38.52	217.77	571.7	2.36	3.16	67.57	-	-	-
	Os03t0291500-01	9.54	217.3	24.32	0.37	0.82	1615.36	-	-	-
	Os07t0678600-02	185.91	215.67	288.66	37.66	144.48	102.58	-	-	-
	Os02t0125300-02	189.43	215.51	599.23	92.69	54.54	129.58	-	-	-
	Os04t0178300-02	108.42	215.21	41.16	0.75	0.42	94.2	-	-	-
	Os08t0500700-01	132.12	214.98	176.58	53.19	109.54	621.86	-	-	-
	Os01t0358100-01	130.81	213.15	187.95	2.37	8.12	2.53	-	-	-
	Os08t0480100-01	185.54	212.92	149.38	138.97	200.74	196.94	-	-	-
	Os04t0620066-00	119.83	212.85	228.8	41.01	84.5	79.58	-	-	-
	Os03t0136975-00	81.25	212.26	133.22	20.88	41.14	54.71	-	-	-
	Os03t0194900-02	60.09	211.51	464.86	8.23	17.63	192.18	-	-	-
	Os03t0250000-02	42.86	210.58	64.61	104.54	114.91	61.34	-	-	-
	Os06t0247500-01	182.07	210.14	40.77	40.71	49.1	22.61	-	-	-
	Os07t0176400-00	86.34	209.75	144.74	30.95	42.15	22.28	-	-	-
	Os05t0553000-01	154.08	209.49	42.99	25.01	61.88	64.69	-	-	-
	Os02t0125300-01	177.31	209.33	565.6	85.6	52.34	142.25	-	-	-
	Os03t0174900-01	144.36	209.09	45.92	11.47	11.46	7.35	-	-	-
	Os10t0457600-01	159.83	207.59	150.95	78.34	137.67	151.56	-	-	-
	Os05t0114400-01	12.55	207.4	49.83	0	0.03	5.45	-	-	-
	Os06t0216300-01	42.62	206.55	594.95	2.44	3	73.92	-	-	-
	Os10t0509100-01	153.37	205.78	130.23	97.16	143.15	92.42	-	-	-
	Os02t0823600-01	168.2	205.62	143.01	115.81	129.72	294.32	-	-	-
	Os01t0794500-00	139.15	205.28	164.47	261.83	198.35	149.78	-	-	-
	Os04t0623300-04	125.16	204.78	160.98	174.55	194.39	106.25	-	-	-
	Os03t0749401-00	130.46	204.55	291.82	51.53	196.31	289.35	-	-	-
	Os05t0121600-00	109.04	203.55	98.56	83.95	149.43	229.98	-	-	-
	Os01t0591300-01	71.84	203.35	75.41	18.13	29.16	15.76	-	-	-
	Os06t0633800-02	175.78	202.85	240.86	228	247.89	340.2	-	-	-
	Os01t0654650-00	144.63	201.75	95.55	161.2	181.69	75.39	-	-	-
	Os02t0177600-01	147.01	201.15	165.04	38.85	209.44	142.83	-	-	-
	Os02t0766600-01	156.8	200.74	136.17	53.15	53.48	50.05	-	-	-
	Os01t0660200-01	108.95	200.64	156.7	36.11	23.71	306.59	-	-	-
	Os03t0720300-01	129.26	199.79	108.98	45.27	83.03	87.02	-	-	-
	Os07t0671800-01	134.24	199.2	218.92	240.55	159.99	196.84	-	-	-
	Os10t0456100-00	49.28	199.18	445.86	10.26	13.95	69.38	-	-	-
	Os01t0563000-05	91.58	198.98	45.6	166.04	193.72	81.22	-	-	-
	Os06t0131400-01	120.61	198.73	149.37	7.07	16.89	236.41	-	-	-
	Os08t0535800-01	52.42	198.7	113.19	135.64	226.01	342.47	-	-	-
	Os08t0535800-02	54.93	198.44	119.3	146.85	227.67	344.55	-	-	-
	Os10t0555600-01	74.76	198.17	6.19	0.94	4.06	1.47	-	-	-
	Os01t0563000-06	103.65	198.01	51.45	177.88	189.9	63.22	-	-	-
	Os04t0679400-03	77.19	197.99	373.52	49.32	39.92	299.38	-	-	-
	Os03t0802500-01	39.04	197.26	353.15	13.81	9.49	278.78	-	-	-
	Os01t0138500-01	2.11	197.26	5.67	8.32	16.69	0.86	-	-	-
	Os03t0368950-00	81.37	197.17	24.27	1.54	5.23	0.32	-	-	-
	Os02t0572400-01	78.07	197.14	206.32	45.35	76.91	180.71	-	-	-
	Os08t0345700-01	109.26	194.65	60.02	11.3	19.64	49.37	-	-	-
	Os06t0175500-01	93.18	194.34	94.42	66.24	86.06	191.65	-	-	-
	Os02t0200900-04	174.47	194.34	154.37	230.74	259.67	130.67	-	-	-
	Os06t0633800-01	164.58	194.15	229.96	213.88	236.58	327.1	-	-	-
	Os03t0808350-00	134.39	193.81	86.4	77.37	121.5	165.15	-	-	-
	Os01t0147950-00	164.95	192.94	86.29	299.68	299.41	104.68	-	-	-
	Os03t0321700-01	91.32	192.63	105.05	2.87	4.27	39.54	-	-	-
	Os04t0679400-04	58.74	192.6	294.64	37.18	36.61	307.81	-	-	-
	Os03t0792050-00	161.95	192.57	115.4	194.7	205.95	129.42	-	-	-
	Os04t0623300-03	113.62	192.44	142.59	149.94	177.05	97.32	-	-	-
	Os07t0678600-01	157.3	191.11	244.16	30.62	117.88	100.9	-	-	-
	Os02t0200900-03	160.25	189.83	146.56	180.05	244.07	140.64	-	-	-
	Os01t0575000-03	105.03	189.67	107.64	59.21	77.11	117.81	-	-	-
	Os01t0249300-02	155.65	189.46	122.66	220.71	230.97	271.64	-	-	-
	Os10t0417600-01	145.06	189.42	55.8	65	158.01	171.34	-	-	-
	Os08t0538600-01	119.58	189.12	386.17	147.02	78.93	191.95	-	-	-
	Os02t0232400-01	151.08	188.94	265.35	111.73	116.5	413.09	-	-	-
	Os03t0274000-01	136.17	188.87	181.59	127.79	206	281.96	-	-	-
	Os01t0214800-01	111.75	188.72	189.74	86.37	124.79	175.28	-	-	-
	Os04t0598000-01	78.84	188.43	76.82	441.47	470.16	31.6	-	-	-
	Os05t0128200-01	53.41	188.04	98.13	159.9	86.18	196.19	-	-	-
	Os05t0176700-01	48.45	187.51	370.41	81.21	34.93	95.82	-	-	-
	Os03t0709000-01	140.96	187.36	417.9	60.2	46.48	365.25	-	-	-
	Os07t0582400-01	55.68	186.91	36.98	117.5	281.04	164.77	-	-	-
	Os06t0166400-01	59.59	186.47	115.42	7.65	5.97	140.57	-	-	-
	Os05t0231700-01	75.9	186.3	165.43	218.31	177.35	30.53	-	-	-
	Os03t0191900-01	14.82	185.73	22.66	12.31	9.14	1.43	-	-	-
	Os03t0191850-01	14.83	185.61	22.64	12.3	9.14	1.43	-	-	-
	Os01t0292200-03	71.17	185.04	121.56	256.76	97.67	237.58	-	-	-
	Os06t0336200-02	155.98	184.19	17.41	70.53	71.14	84.34	-	-	-
	Os04t0178400-01	75.32	183.48	1.48	0.47	0.71	5.23	-	-	-
	Os08t0141300-01	136.23	183.11	245.13	91.67	96.6	233.85	-	-	-
	Os02t0730700-01	152.48	182.99	186.68	122.44	135.8	240.4	-	-	-
	Os06t0644200-01	157.64	182.69	107.68	152.97	238.36	144.5	-	-	-
	Os10t0555651-00	56.45	182.13	3.81	0.7	3.42	1.34	-	-	-
	Os04t0394200-03	158.68	181.64	116.64	40.04	57.52	127.03	-	-	-
	Os12t0586100-01	161.87	181.55	104.02	232.47	187.53	7.56	-	-	-
	Os06t0336200-01	146.66	180.96	16.31	69.01	70.02	79.15	-	-	-
	Os06t0708000-03	71.51	180.58	165.26	84.41	139.05	92.61	-	-	-
	Os05t0157200-01	150.06	180.16	105.22	263.42	190.45	115.07	-	-	-
	Os12t0623950-00	101.97	179.87	62.97	8.64	76.21	99.15	-	-	-
	Os01t0292200-02	56.58	179.5	97.18	213.78	92.82	261.41	-	-	-
	Os03t0820300-01	4.08	179.01	2254.11	2.87	4.1	105.05	-	-	-
	Os01t0915900-01	62.27	178.5	56.52	3.47	3.27	203.09	-	-	-
	Os04t0394200-02	154.6	178.27	113.97	38.94	56.37	124.89	-	-	-
	Os01t0131450-00	116.34	177.91	85.67	85.45	125.65	91.6	-	-	-
	Os10t0577500-02	65.36	177.87	119.44	37.65	48.57	8.16	-	-	-
	Os11t0649600-01	79.87	177.82	140.76	0.93	2.46	4.65	-	-	-
	Os05t0208000-02	124.83	177.18	29.96	23.85	58.3	114.07	-	-	-
	Os02t0572600-01	44.74	176.93	31.1	0.14	0.04	0.04	-	-	-
	Os03t0183050-00	56.55	176.76	51.67	1.11	5.23	59.73	-	-	-
	Os11t0587600-01	45.67	176.11	130.01	0.36	0.43	48.88	-	-	-
	Os01t0214800-03	116.93	175.99	192.78	87.29	115.33	170.02	-	-	-
	Os04t0394200-01	152.48	175.86	112.39	38.38	55.62	123.16	-	-	-
	Os02t0572500-00	67.69	175.82	172.61	44.92	66.66	178.91	-	-	-
	Os05t0128200-02	51.44	175.4	92.28	146.28	77.18	219.96	-	-	-
	Os04t0679400-01	53.51	175.4	267.13	33.86	33.78	281.11	-	-	-
	Os04t0656100-02	27.26	175.31	44.62	16.04	93.97	173.79	-	-	-
	Os10t0577500-01	56.14	174.81	109.8	33.69	47.37	9.51	-	-	-
	Os05t0399300-01	112.98	174.16	463.07	0.72	0.3	11.63	-	-	-
	Os04t0623300-01	87.86	173.22	114.14	109.97	147.72	85.43	-	-	-
	Os07t0129200-01	78.74	172.99	136.88	2.65	0.57	43.13	-	-	-
	Os10t0456000-01	49.79	172.85	417.45	10.23	12.2	57.17	-	-	-
	Os01t0953600-01	145.96	171.8	170.41	54.81	64.8	36	-	-	-
	Os01t0185900-01	13.48	171.51	25.78	0.2	0.4	6.83	-	-	-
	Os11t0186200-01	68.26	170.71	168.21	100.84	112.31	241.61	-	-	-
	Os04t0482000-01	93.81	170.69	79.61	71.3	69.29	155.95	-	-	-
	Os06t0644250-00	147.86	170.51	99.58	142.35	224.04	123.69	-	-	-
	Os01t0707300-01	138.42	169.87	166.43	149.99	144.51	216.67	-	-	-
	Os07t0176500-01	70.19	169.83	114.73	24.22	33.01	18.35	-	-	-
	Os04t0648900-01	42.18	169.75	41.08	35.37	59.51	104.26	-	-	-
	Os01t0563000-04	58.2	169.72	31.57	112.46	175.24	79.09	-	-	-
	Os01t0955100-01	43.63	169.58	537.7	77.25	10.23	126.81	-	-	-
	Os03t0254800-01	139.03	169.57	113.96	52.62	86.39	223.16	-	-	-
	Os04t0667600-01	60.91	169.41	207.72	180.85	79.02	110.04	-	-	-
	Os06t0125800-01	15.04	169.34	69.98	41.7	37.95	310.76	-	-	-
	Os07t0669100-01	154.41	169.09	100.03	173.38	156.49	363.82	-	-	-
	Os03t0821300-02	53.83	168.94	186.59	50.41	34.69	50.82	-	-	-
	Os03t0386500-01	32.22	168.68	60.84	1.33	4.12	6.03	-	-	-
	Os07t0448150-00	92.29	168.15	16.14	0.63	0.33	0.95	-	-	-
	Os10t0444700-01	27.08	167.2	122.53	90.23	82.54	133.79	-	-	-
	Os03t0743500-02	84.92	167.14	265.63	24.56	33.83	295.38	-	-	-
	Os04t0533300-01	149.57	167.01	93.52	766.9	768.09	649.93	-	-	-
	Os07t0622000-01	45.67	166.74	56.08	90.79	136	52.01	-	-	-
	Os04t0648900-02	41.52	166.38	40.39	35.05	58.27	96.94	-	-	-
	Os12t0625000-01	128.78	166.26	227.12	319.17	239.28	380.91	-	-	-
	Os01t0575000-02	88.4	166	88.22	47.18	65.98	104.66	-	-	-
	Os03t0405500-02	121.8	165.86	56.48	21.99	18.44	200.9	-	-	-
	Os01t0575000-01	87.94	165.76	88	46.92	65.85	104.53	-	-	-
	Os02t0611200-03	151.53	165.62	336.75	469.57	497.89	344.58	-	-	-
	Os08t0191150-00	96.1	164.97	50.33	74.43	115.37	108.87	-	-	-
	Os02t0200900-02	124.37	164.97	122.55	131.68	205.08	147.37	-	-	-
	Os05t0576600-01	46.09	164.88	244	6.15	6.83	194.87	-	-	-
	Os07t0571100-03	137.22	164.74	191.66	103.23	126.66	117.68	-	-	-
	Os08t0453200-01	83.84	164.37	50.51	93.15	56.92	180.88	-	-	-
	Os01t0188400-01	142.6	164.21	147.12	77.28	91.17	71.06	-	-	-
	Os01t0131600-02	127.07	163.61	89.88	106.49	126.44	71.77	-	-	-
	Os04t0679400-02	49.71	163.59	258.36	31.54	29.39	263.55	-	-	-
	Os06t0133400-01	46.28	163.23	280.03	108.06	49.42	83.51	-	-	-
	Os06t0340600-01	103.66	163.13	228.58	122.56	88.24	120.68	-	-	-
	Os06t0340600-03	120.95	162.41	260.28	156.47	95.66	89.77	-	-	-
	Os10t0390500-01	93.84	162.14	99.48	15.59	25.95	203.7	-	-	-
	Os03t0290300-01	60.67	162.05	299.92	43.24	115.14	150.77	-	-	-
	Os04t0450100-02	120.15	161.76	292.93	84.33	69.41	172.65	-	-	-
	Os05t0522600-01	36.24	161.69	71.43	6.26	6.56	48.23	-	-	-
	Os12t0477400-01	17.1	161.66	96.85	22.58	58.03	102.05	-	-	-
	Os07t0683600-00	78.48	161.42	65.83	5.25	6.1	13	-	-	-
	Os03t0283100-02	123.25	161.4	651.86	289.33	241.45	290.84	-	-	-
	Os07t0583600-03	51.09	161.33	119.28	189.46	109.63	88.27	-	-	-
	Os04t0678400-01	20.47	161.25	39.49	1.29	6.39	6.88	-	-	-
	Os07t0581000-02	79.16	161.16	135.39	39.9	56.17	89.92	-	-	-
	Os06t0700550-00	98.66	160.99	70.24	3.36	6.52	0.72	-	-	-
	Os05t0119300-03	75.47	160.97	243.03	398.61	261.05	142.97	-	-	-
	Os06t0340600-02	104	160.87	228.05	123.68	87.39	117.6	-	-	-
	Os03t0275500-02	110.49	160.75	100.91	111.61	106.2	119.16	-	-	-
	Os03t0305100-01	89.84	160.63	152.11	19.31	26.33	178.43	-	-	-
	Os08t0235800-00	17.74	160.2	203.77	21.62	14.04	12.06	-	-	-
	Os07t0582450-00	31	159.45	24.55	81.09	229.66	142.65	-	-	-
	Os03t0310800-01	88.06	159.26	154.44	136.81	153.93	167.38	-	-	-
	Os07t0563800-03	119.47	159.13	168.33	63.58	86.84	208.33	-	-	-
	Os04t0610400-00	45.52	158.99	83.34	110.88	86.24	21.62	-	-	-
	Os09t0369000-01	98.73	158.62	107.43	68.02	152.06	136.06	-	-	-
	Os01t0290000-03	131.5	158.43	114.06	315.75	256.83	53.08	-	-	-
	Os09t0511600-03	134.54	158.41	229.33	55.61	72.74	245.52	-	-	-
	Os01t0563000-02	54.32	158.05	29.32	102.56	165.33	75.74	-	-	-
	Os01t0290000-02	133.36	158.05	115.18	320.62	258.28	51.94	-	-	-
	Os02t0638650-01	1.48	157.67	3.08	3.6	4.35	1.02	-	-	-
	Os01t0717000-05	49.33	157.62	90.81	215.22	101.82	43.09	-	-	-
	Os12t0566000-02	113.36	157.38	148.77	3.79	8.79	0.29	-	-	-
	Os10t0444850-00	19.99	157.33	103.13	71.36	78.22	120.7	-	-	-
	Os01t0638000-01	50.45	157.14	206.3	6.8	5.39	142.31	-	-	-
	Os04t0450100-01	106.2	156.98	274.4	75.41	65.82	159.96	-	-	-
	Os09t0486500-02	48.54	156.79	84.73	142.87	54.7	114.37	-	-	-
	Os05t0584200-02	110.61	156.57	191.38	360.67	352.15	125.45	-	-	-
	Os04t0647800-02	60.77	156.56	92.41	25.93	28.21	218.03	-	-	-
	Os02t0753800-01	84.88	156.54	68.12	12.29	17.98	79.1	-	-	-
	Os01t0897600-01	133.65	156.3	48.54	37.63	40.94	27.87	-	-	-
	Os03t0405500-01	87.83	156.2	42.14	15.3	15.68	208.33	-	-	-
	Os11t0591100-01	124.4	155.34	87.25	107.89	140.42	99.88	-	-	-
	Os04t0679500-00	32.68	155.07	177.68	22.71	28.55	293.34	-	-	-
	Os04t0530200-01	116.37	154.51	253.1	228.53	150.74	166	-	-	-
	Os04t0677500-02	132.31	154.34	191.08	101.49	133.39	89.62	-	-	-
	Os03t0802400-01	16.88	154.21	192.1	6.03	6.89	228.29	-	-	-
	Os03t0295800-01	113.22	153.91	63.14	169.55	140.71	128.07	-	-	-
	Os12t0566000-01	76.46	153.76	105.31	1.8	8.51	0.29	-	-	-
	Os09t0511600-04	130.29	153.63	222.09	53.82	70.65	238.13	-	-	-
	Os07t0563800-04	129.97	153.19	179.16	72.45	84.62	185.78	-	-	-
	Os02t0611200-02	135.17	153.06	296.7	377.47	441.2	306.97	-	-	-
	Os10t0510500-01	74.64	152.53	376.48	48.85	35.42	75.69	-	-	-
	Os09t0511600-01	127.92	152.39	218.15	52.88	70.15	235.23	-	-	-
	Os05t0407500-01	100.54	151.75	65.85	41.7	69.72	55.66	-	-	-
	Os09t0367700-01	131.26	151.15	636.27	3.65	3.02	6.35	-	-	-
	Os02t0585100-00	25.85	151.14	621.68	7.3	7.57	42.52	-	-	-
	Os09t0379900-01	63.8	150.54	157.29	2.64	4.86	17.52	-	-	-
	Os01t0248500-01	126.58	150.41	175.17	16.46	20.73	48.36	-	-	-
	Os07t0139400-02	114.55	150.35	190.78	91.28	104.39	119.36	-	-	-
	Os02t0611200-01	127.5	150.35	288.5	346.88	422.37	332.41	-	-	-
	Os02t0200900-01	109.53	150.29	110.72	113.99	184.81	136.24	-	-	-
	Os08t0243500-02	62.97	150.24	188.34	26.23	53.72	113.39	-	-	-
	Os06t0264300-02	123.65	150.15	89.76	106.02	128.08	121.53	-	-	-
	Os03t0132200-01	43.47	150.13	52.65	25.11	50.9	75.62	-	-	-
	Os01t0305200-01	75.76	149.92	178.75	62.14	114.55	219.34	-	-	-
	Os01t0292200-01	39.22	149.88	76.28	144.4	79.31	266.12	-	-	-
	Os03t0218400-01	48.07	149.2	259.79	16.62	26.47	404.86	-	-	-
	Os07t0671901-01	82.29	148.93	179.06	167.31	108.78	129.68	-	-	-
	Os09t0249000-01	122.65	148.4	27.42	4.5	8.86	1.15	-	-	-
	Os04t0474800-03	117.02	148.23	67.76	28.97	64.81	118.7	-	-	-
	Os02t0814000-01	57.98	148.09	150.29	99.38	125.71	306.36	-	-	-
	Os05t0135800-01	113.25	147.6	119.39	118.08	115.27	102.86	-	-	-
	Os01t0131600-01	60.96	147.47	50.85	28.53	86.08	167.32	-	-	-
	Os01t0290000-01	131.13	147.3	111.24	311.54	241.94	47.98	-	-	-
	Os03t0305150-00	77.59	147.15	136.03	17.14	24.48	179.07	-	-	-
	Os07t0581000-01	69.11	146.94	121.11	35.11	51.62	89.13	-	-	-
	Os02t0611250-00	124.41	146.39	281.11	347.9	421.17	302.39	-	-	-
	Os04t0682100-01	90.47	146.34	81.15	25.49	39.14	40.85	-	-	-
	Os11t0514500-01	108.35	146.2	36.16	3.55	2.53	9.99	-	-	-
	Os04t0647800-01	56.75	145.65	86.3	24.16	26.68	203.09	-	-	-
	Os07t0139400-01	111.78	145.57	185.07	88.86	101.08	115.64	-	-	-
	Os10t0444700-02	19.58	145	97.25	70.36	71.42	112.08	-	-	-
	Os07t0691300-01	55.94	144.91	455.38	33.82	50.36	223.2	-	-	-
	Os12t0136500-01	59.42	144.79	91.14	45.12	91.29	31.32	-	-	-
	Os06t0264300-01	120.32	144.67	86.91	102.92	123.51	117.3	-	-	-
	Os02t0209300-01	52.74	144.59	338.09	22.93	22.73	127.97	-	-	-
	Os07t0583600-02	38.51	144.35	92.59	130.63	85.58	75.6	-	-	-
	Os04t0677500-01	121.07	144.23	176.23	92.85	124.14	84.89	-	-	-
	Os01t0357900-01	88.41	142.7	208.53	33.09	56.95	28.05	-	-	-
	Os06t0116100-01	97.81	142.65	166.43	84.53	117.67	98.1	-	-	-
	Os01t0860500-02	41.5	142.63	68.71	16.27	28.86	106.67	-	-	-
	Os01t0627500-01	101.01	142.57	250.25	62.79	43.12	224.55	-	-	-
	Os08t0249000-01	8.04	142.46	25.54	30.81	34.72	14.5	-	-	-
	Os08t0243500-01	56.81	142.3	172.89	22.51	52.01	152.74	-	-	-
	Os04t0556350-00	62.53	141.88	132.64	99.59	79.88	45.66	-	-	-
	Os07t0583600-01	37.72	141.33	90.64	127.88	83.81	74.05	-	-	-
	Os04t0468600-02	84.32	141.3	34.37	20.69	17.56	112.4	-	-	-
	Os01t0971100-01	88.44	141.28	93.61	106.3	150.28	83.41	-	-	-
	Os05t0591900-06	93.29	139.95	226.04	476.41	315.82	359.3	-	-	-
	Os04t0527000-01	56.67	139.71	275.23	5.76	10.16	16.84	-	-	-
	Os05t0568000-01	94.37	139.59	109.81	27.96	33.7	38.92	-	-	-
	Os03t0734300-01	111.43	139.59	489.9	5.53	3.67	247.46	-	-	-
	Os03t0402800-01	106.05	139.51	415.94	151.41	178.21	182.36	-	-	-
	Os07t0563800-02	109.01	139.46	150.34	58.67	76.82	190.52	-	-	-
	Os02t0173200-01	46.37	138.29	322.16	16.65	13.26	135.53	-	-	-
	Os01t0884350-00	27.1	138.03	167.83	59.29	50.11	215.11	-	-	-
	Os02t0670900-05	32.51	137.94	103.17	68.32	105.91	102.53	-	-	-
	Os07t0563800-01	77.07	137.77	109.16	37.12	73.78	208.77	-	-	-
	Os02t0121100-01	112.9	137.76	58.03	78.65	99.35	95.41	-	-	-
	Os01t0847700-01	57.21	137.76	25.91	63.27	68.99	43.99	-	-	-
	Os03t0283100-01	102.53	137.64	542.87	244.71	208.82	256.6	-	-	-
	Os01t0588900-01	40.82	136.95	176.06	340.66	233.23	142.49	-	-	-
	Os12t0624050-00	88.65	136.94	31.44	9.85	42.21	51.03	-	-	-
	Os12t0616500-00	10.06	136.66	17.48	0.18	0.16	0.85	-	-	-
	Os01t0682001-01	18.8	136.52	21.52	4.97	25.3	51.53	-	-	-
	Os02t0600400-01	111.76	136.25	195.51	13.04	12.13	46.96	-	-	-
	Os01t0218100-01	32.01	136.06	26.65	1.83	2.94	13.34	-	-	-
	Os08t0138500-01	100.29	135.99	171.51	91.09	112.69	173.51	-	-	-
	Os02t0177666-00	63.3	135.73	85	17.7	138.59	98.58	-	-	-
	Os03t0231150-00	48.87	135.65	59.69	7.94	7.13	24.61	-	-	-
	Os09t0467200-01	56.93	135.47	67.54	190.35	169.75	702.41	-	-	-
	Os03t0332533-01	46.03	135.42	6.94	0.22	0.29	0.04	-	-	-
	Os01t0588100-00	44.34	135.24	0.24	0.21	0.05	0.07	-	-	-
	Os02t0177633-00	41.47	135.21	54.11	11.1	140.74	102.37	-	-	-
	Os08t0549100-01	114.23	134.83	86.52	588.49	605.55	334.68	-	-	-
	Os03t0275500-01	77.07	134.77	72.65	74.08	82.89	105.6	-	-	-
	Os03t0335300-02	115.92	134.73	129.47	102.04	95.74	366.17	-	-	-
	Os01t0621900-04	104.04	134.44	172.97	28.4	47.7	84.72	-	-	-
	Os03t0582200-02	69.7	134.36	149.54	50.37	52.36	194.55	-	-	-
	Os01t0563000-01	43.36	134.35	22.78	76.89	146.58	69.08	-	-	-
	Os04t0468600-01	85.35	134.29	33.42	21.44	17.06	96.16	-	-	-
	Os01t0871200-02	100.68	133.94	61.51	166.23	158.79	330.86	-	-	-
	Os03t0335300-01	114.39	133.71	127.98	100.64	95.05	362.27	-	-	-
	Os08t0386200-01	7.95	133.49	31.35	63.61	9.09	84.75	-	-	-
	Os03t0673700-01	32.79	133.17	119.07	39.53	44.37	60.43	-	-	-
	Os03t0110300-02	99.82	133.17	169.71	73.33	80.99	106.94	-	-	-
	Os04t0509600-02	29.98	133.15	44.15	24.21	21.86	111.23	-	-	-
	Os09t0453400-01	72.3	132.65	193.23	29.34	31.01	127.25	-	-	-
	Os02t0766700-01	29.8	132.55	48.02	26.83	19.03	46.1	-	-	-
	Os01t0946700-01	28.73	132.46	219.43	0.15	0.04	11.99	-	-	-
	Os06t0662000-02	60.9	132.31	30.32	24.93	68.38	121.32	-	-	-
	Os10t0159800-01	55.77	132.25	35.61	71.55	75.57	24.69	-	-	-
	Os05t0584200-01	92.98	131.55	160.74	303.09	296.03	105.36	-	-	-
	Os07t0571100-02	88.33	131.34	129.05	60.88	92.88	103.72	-	-	-
	Os01t0855600-01	17.75	131.3	168	3.91	1.87	36.37	-	-	-
	Os06t0683400-02	57.14	131.27	469	247.08	72.03	53.66	-	-	-
	Os03t0236200-01	100.51	130.79	67.37	1.26	0.73	14.55	-	-	-
	Os05t0560750-00	31.7	130.67	32.78	29.52	40.59	57.02	-	-	-
	Os02t0670900-02	27.69	130.12	91.75	58.44	99.19	101.55	-	-	-
	Os10t0527400-01	15.77	130.1	1433.79	11.09	8.29	286.86	-	-	-
	Os04t0401700-01	65.92	129.61	90.98	14.05	32.9	130.93	-	-	-
	Os07t0664200-01	67.5	129.44	28.15	0.3	0.1	1.69	-	-	-
	Os04t0401700-02	73.59	129.41	101.61	15.82	33.73	125.82	-	-	-
	Os04t0509600-01	27.21	129.32	40.41	22.41	22.14	113.9	-	-	-
	Os01t0905700-01	37.46	129.23	66.33	16.9	26.78	24.22	-	-	-
	Os08t0120000-05	86.66	129.02	51.17	28.71	43.91	75.56	-	-	-
	Os12t0149900-02	70.88	128.75	88.6	10.93	11.1	116.15	-	-	-
	Os02t0232000-01	6.55	128.64	41.14	0.51	0.59	10.2	-	-	-
	Os05t0493800-01	52.46	128.26	33.88	0.24	0.03	0.35	-	-	-
	Os03t0764600-01	23.74	128.24	172.22	33.61	72.95	261.57	-	-	-
	Os05t0427400-00	65.58	128.21	121.17	2.87	15.26	84	-	-	-
	Os08t0408500-01	39.81	128.03	78.83	37.08	27.07	27.39	-	-	-
	Os03t0283200-00	86.72	127.73	130.98	14.49	10.71	8.74	-	-	-
	Os11t0474800-01	44.63	127.62	7.05	0.21	0.29	12.56	-	-	-
	Os04t0614700-01	43.98	127.51	131.46	33.15	37.75	48.95	-	-	-
	Os03t0345700-01	53.18	127.36	99.45	32.36	57.03	270.03	-	-	-
	Os05t0591900-07	88.95	127.29	209.3	436.06	285.85	318.34	-	-	-
	Os04t0670200-02	91.62	127.08	114.57	11.46	25.79	144.47	-	-	-
	Os05t0311550-00	13.47	127.06	68.33	25.35	66.05	34.67	-	-	-
	Os04t0670200-01	91.11	126.19	113.88	11.36	25.61	145.95	-	-	-
	Os10t0159800-04	63.13	126.15	38.67	72.65	68.12	23.84	-	-	-
	Os07t0631050-00	35.99	126.15	45.86	54.18	113.31	97.66	-	-	-
	Os02t0503900-01	14.39	126.1	16.54	7.59	10.79	10	-	-	-
	Os03t0582200-01	63.73	126.01	137.92	46.61	49.46	182.22	-	-	-
	Os09t0440300-02	84.4	125.78	164.33	123.62	161.87	532.34	-	-	-
	Os09t0425900-02	39.34	125.28	313.22	238.08	92.24	197.3	-	-	-
	Os04t0468600-06	79.03	124.92	31.13	19.82	15.71	88.92	-	-	-
	Os06t0708000-01	42.86	124.87	108.25	43.77	87.11	66.55	-	-	-
	Os05t0591900-04	80.81	124.52	197.52	410.96	279.75	312.27	-	-	-
	Os03t0151800-01	105.09	124.45	178.18	83.79	94.96	169.55	-	-	-
	Os02t0748300-02	68.62	123.97	111.04	50.76	84.67	166.7	-	-	-
	Os03t0292100-01	22.06	123.94	104.24	100.84	22.58	78.13	-	-	-
	Os09t0440300-01	81.81	123.88	158.23	120.2	157.76	523.66	-	-	-
	Os02t0734300-01	50.12	123.84	29.62	61.57	40.36	69.6	-	-	-
	Os01t0717000-01	28.7	123.84	53.71	128.11	77.82	38.38	-	-	-
	Os01t0172400-02	111.36	123.82	63.81	73.3	118.25	109.92	-	-	-
	Os11t0246166-00	45.43	123.41	71.17	17.26	18.68	93.24	-	-	-
	Os07t0424400-02	57.58	123.34	27.98	31.72	150.45	10.52	-	-	-
	Os06t0103500-02	112.28	123.34	87.58	123.29	144.04	171.99	-	-	-
	Os01t0926800-01	76.91	123.06	65.6	139.13	113.45	239.56	-	-	-
	Os11t0148500-01	112.52	123.02	141.19	115.26	131.84	106.91	-	-	-
	Os04t0401751-00	57.58	122.93	87.47	14.9	33.15	123.82	-	-	-
	Os03t0342900-01	70.88	122.89	59.88	126.27	134.28	157.43	-	-	-
	Os05t0324700-01	17.65	122.72	682.91	4.89	2.04	93.15	-	-	-
	Os11t0246200-00	48.33	122.61	69.78	17.8	18.51	113.79	-	-	-
	Os11t0147800-02	55.84	122.6	36.67	62.64	88.53	60.12	-	-	-
	Os12t0421000-01	44.77	122.57	70.19	19.48	45.62	40.8	-	-	-
	Os10t0525800-00	10.52	122.09	594.65	0.39	0.28	10.71	-	-	-
	Os04t0401700-03	59.54	121.98	82.02	13.3	31.18	124.23	-	-	-
	Os05t0591925-00	71.99	121.86	204.95	449.2	273.91	405.13	-	-	-
	Os12t0552550-00	78.18	121.25	171.52	257.46	239.74	471.97	-	-	-
	Os01t0871200-01	93.72	121.23	56.36	153.91	143.85	299.65	-	-	-
	Os05t0561600-01	20.2	121.22	57.3	13.34	31.34	70.23	-	-	-
	Os09t0538400-01	31.95	121.13	29.66	9.3	13.69	6.15	-	-	-
	Os04t0687125-00	64.54	120.83	45.84	10.42	19.83	18.65	-	-	-
	Os01t0172400-04	96.87	120.83	51.58	53.96	108.99	102.61	-	-	-
	Os05t0522600-02	15.27	120.68	43.84	1.94	3.63	34.51	-	-	-
	Os04t0468600-03	66.6	120.65	26.71	15.19	15.11	99.06	-	-	-
	Os06t0103500-01	109.59	120.62	85.81	120.28	140.64	168.41	-	-	-
	Os03t0821300-01	29.13	120.48	110.68	26.57	22.24	41.77	-	-	-
	Os10t0574700-01	56.52	120.39	373.59	74.07	64.69	183.68	-	-	-
	Os05t0176100-01	53.19	120	15.57	13.69	91.21	9.66	-	-	-
	Os10t0509100-02	93.32	119.69	101.34	73.27	76.69	55.72	-	-	-
	Os02t0181200-00	4.28	119.68	46.98	13.66	14.24	38.61	-	-	-
	Os04t0653400-01	101.56	119.08	116.54	46.24	59.33	118.62	-	-	-
	Os07t0580900-01	68.37	118.88	45.34	40.91	45.52	112.69	-	-	-
	Os01t0713200-01	62.56	118.75	7.57	13.24	139.66	486.25	-	-	-
	Os01t0871200-04	90.28	118.56	55.67	148.59	139.06	291.1	-	-	-
	Os05t0503300-03	96.53	118.42	82.96	86.42	120.96	93.41	-	-	-
	Os12t0149900-01	64.97	118.14	81.39	10.12	10.42	112.43	-	-	-
	Os10t0481000-00	5.23	118.07	31.66	4.09	4.15	99.98	-	-	-
	Os07t0539300-01	41.47	117.99	32.91	5.45	10.49	62.28	-	-	-
	Os02t0711400-01	14.62	117.58	50.92	10.69	36.89	23.99	-	-	-
	Os08t0485400-01	84.18	117.57	40.59	7.06	5.49	29.5	-	-	-
	Os02t0819500-01	52.35	117.46	92.24	102.8	151.43	156.4	-	-	-
	Os07t0539350-00	42.31	117.27	32.72	5.55	10.89	64	-	-	-
	Os09t0409100-01	11.03	117.06	2.77	0.19	0	0	-	-	-
	Os10t0555100-01	34.15	116.96	39	34.21	18.59	21.06	-	-	-
	Os01t0218150-00	25.1	116.91	21.18	0.74	2.48	9.18	-	-	-
	Os02t0125350-00	56.46	116.12	223.31	28.01	26.38	65.94	-	-	-
	Os06t0470000-01	62.99	115.78	125.63	17.94	30.03	192.62	-	-	-
	Os05t0497300-01	58.36	115.45	140.46	160.46	92.55	33.82	-	-	-
	Os01t0139200-02	69.89	115.45	75.58	44.59	52.75	168.76	-	-	-
	Os03t0345901-00	41.81	115.33	84.95	25.03	51.18	309.05	-	-	-
	Os11t0152700-02	72.3	114.57	31.01	1.41	1.79	1.5	-	-	-
	Os08t0416800-01	54.25	114.49	126.41	207.17	223.61	331.67	-	-	-
	Os08t0447000-01	74.96	114.36	138.37	36.93	57.78	76.61	-	-	-
	Os10t0405300-01	31.52	114.12	93.24	33.04	66.58	81.91	-	-	-
	Os05t0573300-01	32.6	114.07	70.49	22.69	33.6	43.46	-	-	-
	Os01t0139200-01	69.06	114.01	74.69	44.1	52.13	166.75	-	-	-
	Os09t0401300-01	53.77	113.74	83.38	66.41	84.22	132.94	-	-	-
	Os01t0923700-03	86.99	113.65	121.66	35.5	27.22	90.26	-	-	-
	Os06t0255400-01	19.8	113.58	42.4	143.11	79.71	37.12	-	-	-
	Os04t0121800-01	84.89	113.56	148.68	15.41	16.89	273.19	-	-	-
	Os01t0214901-00	43.78	113.52	92.65	39.39	72.31	97.34	-	-	-
	Os02t0740600-01	21.48	113.42	531.2	10.78	10.26	49.04	-	-	-
	Os08t0120600-01	44.61	113.38	188.35	1.72	3.61	24.88	-	-	-
	Os02t0157600-01	29.69	113.14	20.18	9.2	9.55	11	-	-	-
	Os01t0930200-01	83.94	112.97	220.86	101.25	115.63	219.28	-	-	-
	Os01t0866800-01	67.44	112.95	59.67	33.02	48.19	19.01	-	-	-
	Os01t0933200-00	57.6	112.84	182.71	88.82	153.42	81.02	-	-	-
	Os01t0846300-01	23.95	112.84	42.99	34.43	21.9	28.46	-	-	-
	Os11t0671100-01	69.32	112.7	58.8	194.76	81.35	170.99	-	-	-
	Os05t0474800-01	6.93	112.58	23.16	1.43	1.93	30.82	-	-	-
	Os10t0422000-01	69.58	112.02	78.99	30.7	41.03	75.78	-	-	-
	Os05t0494050-00	67.69	111.81	60.02	24.36	51.66	33.84	-	-	-
	Os05t0198250-00	31.89	111.72	88.64	53.94	43.23	11.47	-	-	-
	Os01t0927600-01	58.77	111.64	109.72	105.05	151.96	94.89	-	-	-
	Os01t0923700-02	74.76	111.64	108.25	28.98	25.64	91.68	-	-	-
	Os01t0627550-00	69.63	111.61	191.41	44.89	34.15	188.48	-	-	-
	Os05t0407550-01	26.86	111.56	30.83	9.75	43.02	45.94	-	-	-
	Os02t0755900-01	68.09	111.52	297.08	0.73	0.97	28.05	-	-	-
	Os02t0135500-02	64.61	111.49	93.81	21.69	33.85	88.51	-	-	-
	Os11t0152700-01	69.23	111.46	29.87	1.37	1.73	1.49	-	-	-
	Os07t0169600-01	35.52	111.36	35.6	14.14	28.97	83.03	-	-	-
	Os05t0591900-03	78.28	111.36	182.29	381.68	250.3	277.86	-	-	-
	Os08t0535900-01	37.95	111.27	80.79	87.37	115.09	142.22	-	-	-
	Os08t0416000-01	62.78	111.25	54.84	37.03	81.87	93.91	-	-	-
	Os02t0806600-02	82.37	111.03	114.35	40.3	72.24	82.45	-	-	-
	Os08t0428400-02	48.34	110.51	93.16	16.27	29.78	17.94	-	-	-
	Os03t0342900-04	72.55	110.37	57.42	124.39	122.91	141.22	-	-	-
	Os02t0820000-01	94.84	110.33	87.88	98.93	98.39	131.06	-	-	-
	Os10t0416100-01	35.67	110.12	98.59	12.21	18.27	123.04	-	-	-
	Os12t0502800-03	91.55	110.05	123.46	30.41	25.78	92.95	-	-	-
	Os12t0502800-01	90.45	110.04	122.76	30.27	26.02	92.08	-	-	-
	Os05t0560600-02	31.44	109.85	30.08	31.5	35.96	44.3	-	-	-
	Os02t0603800-01	66.97	109.84	45.07	67.15	82.29	388.46	-	-	-
	Os07t0448200-00	22.39	109.83	1.75	0.06	0.02	0.04	-	-	-
	Os07t0539300-02	36.64	109.81	31.21	5.13	10.07	61.39	-	-	-
	Os09t0258000-01	73.68	109.75	96.25	68.3	88.65	167.35	-	-	-
	Os01t0855700-01	12.16	109.53	122.66	2.68	1.62	29.23	-	-	-
	Os08t0475400-02	77.26	109.52	125.63	13.69	28.05	30.32	-	-	-
	Os01t0297200-01	49.24	109.49	57.61	0.32	0.18	19.62	-	-	-
	Os03t0102775-00	32.69	109.33	3.61	0.58	18.26	4.48	-	-	-
	Os04t0529100-01	20.41	109.28	5.38	1.37	2.43	0.53	-	-	-
	Os03t0386000-01	23.52	109.18	14.19	4.17	15.21	4.38	-	-	-
	Os09t0401300-02	61.5	109.04	94.04	77.52	81.77	112.45	-	-	-
	Os07t0448400-01	37.94	109.01	6.7	0.53	1.21	0.12	-	-	-
	Os03t0122850-00	41.37	109.01	36.36	40.24	92.53	31.02	-	-	-
	Os01t0850900-01	48.41	108.96	376.75	32.6	89.77	306.62	-	-	-
	Os01t0167500-01	92.93	108.93	69.68	21.91	32.68	41.38	-	-	-
	Os12t0636200-03	79.79	108.87	78.74	43.7	55.54	66.25	-	-	-
	Os02t0224100-01	50.23	108.77	28.01	18.81	46.03	53.78	-	-	-
	Os03t0845000-01	46.55	108.73	283.56	63.53	75.77	85.38	-	-	-
	Os10t0416100-02	37.53	108.54	100.02	12.83	18.72	119.88	-	-	-
	Os05t0494000-01	86.37	107.8	65.55	29.03	49.47	33.8	-	-	-
	Os04t0543500-00	74.49	107.8	405.06	96.17	78.44	93.1	-	-	-
	Os02t0184900-01	25.56	107.8	8.91	0.61	1.11	1.88	-	-	-
	Os02t0135500-01	61.04	107.52	93.83	21.07	32.51	84.92	-	-	-
	Os09t0533400-01	83.83	107.51	162.44	150.83	178.36	184.92	-	-	-
	Os05t0231600-01	17.25	107.4	58.09	66.82	96.11	19.94	-	-	-
	Os02t0806600-03	70.83	107.25	97.68	32.26	65.25	111.25	-	-	-
	Os01t0621900-03	78.23	107.25	126.02	16.98	34.31	64.94	-	-	-
	Os04t0474800-02	78.7	107.21	46.25	19.55	46.51	92.84	-	-	-
	Os06t0301100-01	73.92	106.9	73.86	66.03	76.15	78.5	-	-	-
	Os03t0285800-02	55.66	106.83	144.16	46.63	27.71	106.5	-	-	-
	Os01t0965900-01	45.13	106.77	37.67	45.39	55.34	88.38	-	-	-
	Os03t0122300-01	22.31	106.73	42.68	3.45	23.32	114.42	-	-	-
	Os09t0441400-01	41.74	106.66	58.67	58.08	95.48	152.6	-	-	-
	Os01t0846300-02	21.86	106.61	39.49	30.69	19.64	26.61	-	-	-
	Os02t0806600-01	69.92	106.5	96.58	31.81	64.66	110.35	-	-	-
	Os11t0546750-00	56.02	106.47	33.13	30.83	58.89	127.4	-	-	-
	Os01t0130000-02	82.81	106.17	75.98	14.68	19.39	90.32	-	-	-
	Os07t0123900-01	56.36	106.06	211.34	71.16	55.27	77.89	-	-	-
	Os02t0664050-00	37.63	105.85	105.76	105.75	90.92	68.07	-	-	-
	Os07t0569166-01	18.05	105.75	86.95	64.58	82.51	63.13	-	-	-
	Os06t0146800-01	29.91	105.41	399.78	1.63	1.83	190.57	-	-	-
	Os06t0206900-01	10.83	105.25	11.11	20.01	12.29	5.41	-	-	-
	Os07t0571100-01	41.75	105.21	75.87	17.02	62.44	90.05	-	-	-
	Os08t0480901-00	65.05	105.16	37.46	62.05	96.53	102.83	-	-	-
	Os01t0874700-02	57.1	104.96	102.2	6.21	7.91	41.06	-	-	-
	Os01t0976300-01	33.53	104.95	218.54	2.64	2.48	49.14	-	-	-
	Os08t0162100-01	82.98	104.85	98.42	47.74	91.36	93.96	-	-	-
	Os04t0543900-02	57.84	104.82	67.31	13.74	22.28	139.69	-	-	-
	Os03t0701200-01	41.95	104.76	113.92	39.59	10.99	98.64	-	-	-
	Os11t0474900-00	12.64	104.74	2.19	0.19	0.17	26.79	-	-	-
	Os09t0249100-01	69.69	104.7	20.37	2.86	6.3	0.73	-	-	-
	Os05t0484800-01	7.63	104.66	9.7	1.58	2.86	0.22	-	-	-
	Os02t0578800-01	76.1	104.59	61.08	86.21	61.72	118.35	-	-	-
	Os03t0405525-00	31.23	104.5	18.5	4.56	8.16	146.55	-	-	-
	Os01t0841000-01	72.1	104.45	58.76	11.49	20.65	15.2	-	-	-
	Os03t0188500-01	46.31	104.44	434.68	13.38	9.94	21.86	-	-	-
	Os01t0615300-01	85.59	104.43	66.57	30.87	42.09	46.78	-	-	-
	Os01t0621900-02	74.98	104.2	121.69	16.05	33.25	63.03	-	-	-
	Os03t0761100-01	35.52	104.02	518.84	54.24	41.48	111.03	-	-	-
	Os03t0854100-01	83.05	103.99	70.29	30.15	55.64	60.59	-	-	-
	Os01t0172400-01	73.03	103.97	38.87	35.92	87.91	90.06	-	-	-
	Os03t0181100-02	36.1	103.9	260.28	154.36	84.3	34.29	-	-	-
	Os03t0250000-01	17.09	103.76	27.22	40.35	51.87	30.77	-	-	-
	Os01t0105900-01	72.78	103.71	47.12	51.4	70.97	68.31	-	-	-
	Os04t0447700-01	21.06	103.67	109.8	10.11	7.47	185.39	-	-	-
	Os02t0232050-00	4.72	103.64	31.77	0.49	0.48	10.91	-	-	-
	Os01t0170000-01	8.91	103.47	12.97	18.62	46.88	13.38	-	-	-
	Os12t0631100-01	68.3	103.46	204.97	63.68	69.67	106.89	-	-	-
	Os04t0119500-03	56.24	103.44	126.79	99.18	120.45	111.91	-	-	-
	Os01t0874700-01	56.02	103.37	100.28	6.11	7.81	40.58	-	-	-
	Os07t0522500-01	78.5	103.26	125.19	16.38	14.15	177.09	-	-	-
	Os06t0601100-02	56.5	103.26	57.57	107.87	160.5	116.78	-	-	-
	Os02t0819500-03	48.04	103.19	87.87	91.35	129.78	136.37	-	-	-
	Os08t0428400-01	35.9	103.1	71.56	11.33	26.66	21.89	-	-	-
	Os01t0841000-02	72.41	103.07	59.21	11.64	20.34	15.13	-	-	-
	CUFF.12982.1	13.83	103.01	15.95	3.76	33.67	30.43	chr03	14854285	14854693
	Os04t0111200-01	77.75	102.9	237.36	194.51	107.29	327.19	-	-	-
	Os02t0671300-01	25.31	102.86	13.47	0.48	1.16	2.03	-	-	-
	Os01t0615300-02	87.16	102.79	66.8	31.18	41.37	46.53	-	-	-
	Os09t0553300-01	27.97	102.78	29.44	20.23	30.75	20.2	-	-	-
	Os12t0631100-02	69.8	102.58	206.2	64.62	69.66	105.94	-	-	-
	Os01t0287600-01	40.31	102.57	25.11	11.73	10.91	2.51	-	-	-
	Os02t0819500-04	55.01	102.3	105.18	113.9	139.32	127.26	-	-	-
	Os12t0437800-01	77.55	102.28	395.06	1.67	0.45	164.24	-	-	-
	Os01t0797600-01	34.3	102.25	92.46	28.67	76.68	14.05	-	-	-
	Os10t0555900-01	73.02	102.16	9.96	34.2	59.27	8.22	-	-	-
	Os03t0761100-03	36.69	101.93	510.2	56.62	41.41	104.03	-	-	-
	Os02t0276200-01	65.99	101.81	5.81	1.17	2.56	0.01	-	-	-
	Os03t0285800-01	52.8	101.63	136.97	44.28	26.44	101.07	-	-	-
	Os11t0183900-01	84.07	101.6	101.76	10.03	21.59	59.17	-	-	-
	Os01t0615400-00	68.53	101.57	53.41	26.87	40.83	44.03	-	-	-
	Os06t0129100-01	32.71	101.35	41.54	3.33	5.53	17.64	-	-	-
	Os05t0454500-01	38.7	101.32	85.15	35.17	14.92	84.39	-	-	-
	Os01t0878800-02	66.33	101.24	56.26	24.96	56.54	36.47	-	-	-
	Os03t0316200-01	1.62	101.2	47.26	7.57	39.5	3.67	-	-	-
	Os03t0335300-03	65.46	100.91	69.65	37.98	64.94	258.71	-	-	-
	Os01t0750100-02	50.48	100.73	66.15	63.41	42.04	132.6	-	-	-
	Os10t0491000-01	25.06	100.45	194.82	42.6	107.93	208.38	-	-	-
	Os06t0708000-02	37.21	100.39	86.29	39.19	72.07	52.7	-	-	-
	Os05t0499800-02	10.68	100.22	9.68	26.88	34.14	17.16	-	-	-
	Os02t0176700-00	61.54	100.19	33.34	5.29	12.19	27.84	-	-	-
	Os02t0131100-02	61.79	100.18	41.94	54.47	49.27	118.45	-	-	-
	Os03t0133400-01	35.73	100	68.76	71.54	179.74	90.84	-	-	-
	Os10t0542900-01	28.67	99.9	119.22	14.34	15.85	149.02	-	-	-
	Os01t0583100-01	43.64	99.9	31.23	119.97	63.52	45.24	-	-	-
	Os08t0482600-01	38.8	99.79	290.75	14.9	2.12	46.97	-	-	-
	Os07t0638100-01	39.32	99.72	667.05	8.5	10.15	182.03	-	-	-
	Os02t0166600-01	24.87	99.6	59.73	6.75	15.97	19.41	-	-	-
	Os01t0621900-01	73.27	99.56	117.32	16.09	31.85	60.48	-	-	-
	Os01t0383700-01	70.38	99.36	65.88	41.26	51.01	61.63	-	-	-
	Os01t0878800-01	74.41	99.27	62.7	27.15	57.06	36.03	-	-	-
	Os11t0537375-00	22.74	99.2	131.67	13.91	29.55	171.46	-	-	-
	Os03t0356700-01	65.02	99.15	37.22	13.49	21.85	21.06	-	-	-
	Os08t0189600-01	58.71	99.01	893.52	0.44	0.3	205.7	-	-	-
	Os03t0128700-01	52.76	98.97	104.64	19.81	34.97	71.13	-	-	-
	Os05t0317200-01	66.7	98.95	92.16	40.78	38.09	80.53	-	-	-
	Os04t0492450-00	31.29	98.88	209.07	99.77	59.72	64.7	-	-	-
	Os12t0210300-01	63.58	98.76	71.52	106.3	83.13	134.94	-	-	-
	Os10t0535800-01	72.38	98.74	159.64	7.05	7.63	44.17	-	-	-
	Os07t0417200-01	44.32	98.71	60.91	0.16	0.11	16.5	-	-	-
	Os04t0584600-02	90.85	98.66	115.42	75.25	106.52	269.33	-	-	-
	Os07t0658400-02	56.8	98.65	43.86	487.75	659.6	422.99	-	-	-
	Os01t0750100-03	51.94	98.65	72.1	68.48	41.98	109.14	-	-	-
	Os06t0133500-00	6.82	98.63	1012.72	14.05	3.51	82.9	-	-	-
	Os09t0557800-01	75.5	98.6	70.48	21.42	44.79	129.04	-	-	-
	Os07t0108300-02	76.96	98.57	92.87	1619.97	1718.97	437.1	-	-	-
	Os02t0748300-01	54.02	98.56	88.09	38.71	64.45	107.15	-	-	-
	Os04t0517100-01	41.61	98.28	202.65	6.63	8.12	39.65	-	-	-
	Os01t0170051-00	3.52	98.25	13.48	10.13	42.14	15.41	-	-	-
	Os07t0442900-01	38.49	98.05	108.29	0.59	0.36	43.23	-	-	-
	Os05t0278500-01	52.82	97.97	17.28	0.97	0.54	12.42	-	-	-
	Os04t0686000-01	12.34	97.95	52.14	0.17	0.28	9.91	-	-	-
	Os01t0826400-01	11.55	97.85	113.49	18.91	7.7	70.67	-	-	-
	Os01t0507700-01	41.32	97.84	30.83	128.38	142.11	131.21	-	-	-
	Os04t0618200-01	69.17	97.74	211.72	16.89	33.34	121.23	-	-	-
	Os07t0252400-01	71.98	97.68	34.87	8.67	21.54	3.41	-	-	-
	Os04t0497250-00	69.97	97.63	31.82	8.96	12.78	1.84	-	-	-
	Os04t0119500-02	51.07	97.59	116.99	88.78	112.6	108.86	-	-	-
	Os02t0697300-01	76.12	97.32	113.27	53.6	65.19	123.06	-	-	-
	Os04t0591100-01	79.14	97.24	124.42	28.93	16.67	94.36	-	-	-
	Os02t0118200-01	19.2	97.23	168.43	14.32	21.33	71.7	-	-	-
	Os02t0625300-00	8.54	97.18	24.4	28.03	21.67	13.43	-	-	-
	Os12t0623500-02	75.18	97.11	121.84	147.45	101.47	171.86	-	-	-
	Os10t0422050-00	49.34	97.03	57.9	20.7	34.43	74.42	-	-	-
	Os01t0254900-01	78.57	97	128.8	95.64	115	119.7	-	-	-
	Os02t0669500-01	82.36	96.69	167.82	11.01	6.38	44.59	-	-	-
	Os04t0468600-05	71.69	96.67	28.93	18	12.24	71.5	-	-	-
	Os08t0191700-02	80.97	96.51	52.94	289.82	222.77	179.04	-	-	-
	Os01t0130000-01	66.28	96.5	67.56	12.53	18.7	89.71	-	-	-
	Os08t0562600-01	52.38	96.34	185.69	172.38	252.8	445.75	-	-	-
	Os01t0874700-03	64.26	96.32	111.07	6.77	7.74	42.39	-	-	-
	Os02t0729700-01	65.31	96.28	86.16	208.79	391.22	304.95	-	-	-
	Os02t0620600-01	3.07	96.19	2.97	0.6	1.17	0.43	-	-	-
	Os05t0585500-01	61.61	96.17	130.11	25.4	32.62	60.92	-	-	-
	Os01t0952900-01	1.86	96.05	422.19	3.05	3.1	11.1	-	-	-
	Os09t0106700-01	29.13	95.85	46.51	27	41.52	62.6	-	-	-
	Os03t0854000-01	54.12	95.61	97.01	108.58	173.89	72.76	-	-	-
	Os06t0129900-02	57.5	95.59	57.36	116.28	76.8	71.51	-	-	-
	Os03t0279400-02	81.3	95.57	21.17	17.89	14.94	20.31	-	-	-
	Os02t0261150-00	44.46	95.46	135.19	31.14	42.63	58.02	-	-	-
	Os05t0135450-00	10.61	95.38	153.77	0.11	0.34	1.1	-	-	-
	Os03t0116300-01	52.69	95.33	106.32	63.13	119.83	103.24	-	-	-
	Os04t0338000-01	76.88	95.12	70.44	69.1	89.07	73.86	-	-	-
	Os02t0813500-02	41.03	95.06	62.59	19.66	42.18	167.57	-	-	-
	Os01t0978100-03	73.28	94.95	45.77	308.96	365.66	307.25	-	-	-
	Os10t0577800-02	54.66	94.87	76.13	30.02	84.58	163.67	-	-	-
	Os06t0199200-05	77.87	94.85	85.99	93.44	133.79	179.92	-	-	-
	Os10t0555900-02	65.58	94.81	9.26	31.09	55.84	7.63	-	-	-
	Os05t0499800-01	9.88	94.75	9.07	25.04	32.28	16.4	-	-	-
	Os03t0299200-01	20.5	94.71	201.97	36.97	30	197.69	-	-	-
	Os11t0557000-01	39.98	94.69	8.07	4.68	11.66	12.06	-	-	-
	Os05t0555700-01	24.31	94.65	134.62	15.2	18.38	80.15	-	-	-
	Os12t0571000-01	11.05	94.42	1862.75	0.65	1.08	153.7	-	-	-
	Os01t0210500-01	70.95	94.38	55.26	71.77	154.3	49.25	-	-	-
	Os03t0141200-01	10.07	94.3	12.48	20.17	71.03	70.67	-	-	-
	Os01t0978100-02	71.92	94.25	45.01	302.23	361.07	301.52	-	-	-
	Os11t0600700-02	57.87	94.23	99.02	47.58	49.16	83.48	-	-	-
	Os03t0181100-01	32.94	94.23	237.1	141.13	76.9	31.1	-	-	-
	Os02t0822500-04	46.7	94.19	41.91	36.98	42.85	48.08	-	-	-
	Os04t0623300-02	55.14	93.93	67.29	69.42	85.38	45.5	-	-	-
	Os06t0649000-02	17.88	93.91	154.24	3.32	3.02	57.36	-	-	-
	Os04t0306400-01	32.83	93.83	73.78	90.91	113.56	80.81	-	-	-
	Os03t0833900-01	64.79	93.67	49.45	105.83	112.82	38.28	-	-	-
	Os07t0580900-02	40.14	93.62	27.71	28.2	36.25	91.22	-	-	-
	Os01t0923700-01	53.13	93.52	81.22	19.86	20.58	87.42	-	-	-
	Os01t0582600-01	16.43	93.49	174.16	75.35	29.25	53.51	-	-	-
	Os04t0684900-01	29.47	93.36	55.2	62.72	30.28	48.54	-	-	-
	Os02t0579600-00	69.6	93.32	61.85	3.02	3.76	2.79	-	-	-
	Os12t0573200-01	69.8	93.24	120.7	17.17	21.98	83.04	-	-	-
	Os08t0176900-01	76.59	93.23	80.8	19.29	23.18	39.08	-	-	-
	Os01t0655800-01	83.66	92.93	87.29	58.27	58.59	117.96	-	-	-
	Os11t0506800-00	0.69	92.79	81.97	0.28	0.5	22.06	-	-	-
	CUFF.24011.2	24.88	92.29	28.36	37.03	99.77	160.8	chr06	10372088	10373768
	Os05t0553400-01	29.55	92.28	130.12	4.71	5.47	49.84	-	-	-
	Os03t0125100-01	22.26	92.2	26.28	20.46	27.18	7.78	-	-	-
	Os01t0672400-04	67.47	92.13	87.61	81.12	63.27	80.82	-	-	-
	Os12t0623500-01	69.13	92.12	115.42	134.66	95.87	163.81	-	-	-
	Os09t0272000-01	27.31	91.94	144.79	21.29	29.77	28.51	-	-	-
	Os04t0684900-02	28.21	91.76	53.91	60.6	29.25	46.61	-	-	-
	Os06t0649000-01	17.43	91.72	151.14	3.16	2.89	54.9	-	-	-
	Os02t0184800-00	17.18	91.53	6.68	0.53	0.95	1.7	-	-	-
	Os03t0567600-02	41.91	91.51	143.2	43.14	62.99	121.68	-	-	-
	Os01t0194600-02	60.82	91.42	195.16	36.72	44.96	5.35	-	-	-
	Os08t0179900-01	61.82	91.37	103.2	211.02	148.68	137.81	-	-	-
	Os02t0471500-03	65.05	91.36	75.05	28.54	62.75	51.41	-	-	-
	Os03t0150600-01	17.27	91.24	40.74	61.9	32.97	210.73	-	-	-
	Os10t0370800-02	61.02	91.21	35.39	6.8	7.36	6.23	-	-	-
	Os01t0916100-01	16.89	91.14	9.39	5.26	5.5	76.73	-	-	-
	Os01t0510100-01	71.86	91.14	47.12	46.27	54.81	91.32	-	-	-
	Os11t0210201-00	13.81	90.95	624.62	37.8	17.91	634.01	-	-	-
	Os07t0617000-01	46.46	90.91	266.95	8.64	16.9	68.28	-	-	-
	Os01t0747800-01	33.3	90.81	50.48	23.82	36.07	49.01	-	-	-
	Os09t0332700-01	65.42	90.8	135.19	27.58	19.07	92.27	-	-	-
	Os07t0617000-02	46.62	90.63	266.66	8.72	16.64	67.44	-	-	-
	Os04t0618200-02	63.12	90.58	195.57	15.76	30.93	113.39	-	-	-
	Os03t0761100-02	29.72	90.53	449.08	45.32	34.93	91.55	-	-	-
	Os01t0817650-00	3.27	90.47	13.82	2.34	1.66	2.2	-	-	-
	Os06t0129900-01	54.07	90.44	53.28	108.02	72.51	68.71	-	-	-
	Os01t0750100-01	49.37	90.44	67.6	61.98	38.75	116.28	-	-	-
	Os10t0564500-01	42.13	90.43	28.67	30.33	29.87	53.82	-	-	-
	Os04t0252850-00	50.56	90.33	31.83	277.16	861.58	269.3	-	-	-
	Os05t0438800-01	44.71	90.19	64.97	63.36	62.83	48.75	-	-	-
	Os09t0110300-02	68.25	90.05	60.76	6.31	4.85	9.3	-	-	-
	Os01t0563000-03	10.65	89.76	7.95	25.61	102.27	56.72	-	-	-
	Os10t0370000-02	38.53	89.74	48.72	26.32	23.69	15.62	-	-	-
	Os08t0485400-02	64.95	89.66	31.64	5.71	3.84	23.62	-	-	-
	Os01t0639600-01	14.7	89.62	365.37	8.54	7.5	27.94	-	-	-
	Os01t0296200-00	29.23	89.47	27.83	4.31	7.64	2.8	-	-	-
	Os01t0846150-00	16.12	89.4	33.93	25.27	16.21	18.26	-	-	-
	Os06t0603000-01	39.01	89.25	89.22	98.41	69.57	737.09	-	-	-
	Os04t0253000-01	68.19	89.25	40.98	386.68	875.82	241.65	-	-	-
	Os04t0637000-01	79.83	89.21	109.04	29.49	18.78	30.08	-	-	-
	Os02t0822500-03	42.64	89.15	38.49	33.23	40.37	46.26	-	-	-
	Os02t0324700-01	77.91	89.15	202.29	115.05	77.08	159.54	-	-	-
	Os07t0108300-01	66.31	88.71	80.09	1361.45	1545.74	422.62	-	-	-
	Os02t0580366-00	47.2	88.66	22.65	46.37	72.75	60.74	-	-	-
	Os01t0672400-03	56.46	88.65	77.1	67.37	57.81	88.32	-	-	-
	Os03t0231000-00	6.2	88.58	20.24	1.72	4.52	15.54	-	-	-
	Os03t0571900-01	44.17	88.54	117.03	47.33	34.14	83.44	-	-	-
	Os06t0171900-02	72.48	88.47	101.61	92.72	77.53	152.07	-	-	-
	Os02t0173800-01	53.78	88.41	133.1	23.21	23.57	71.45	-	-	-
	Os12t0111600-01	46.53	88.3	92.35	3.58	4.75	9.6	-	-	-
	Os01t0833400-01	14.63	88.15	37.67	34.44	20.01	14.5	-	-	-
	Os03t0320100-01	23.79	88.13	5.22	13.7	15.92	54.95	-	-	-
	Os01t0609900-02	49.75	88.01	107.64	1.06	2.65	109.49	-	-	-
	Os11t0600700-01	53.82	87.88	92.78	44.56	46.51	78.68	-	-	-
	Os06t0470075-00	47.8	87.84	97.95	13.79	22.96	117.21	-	-	-
	Os06t0659300-01	35.03	87.82	77.39	14.54	27.96	15.8	-	-	-
	Os12t0502800-04	74.08	87.77	99.86	24.46	20.63	72.87	-	-	-
	Os09t0110300-01	66.47	87.66	59.1	6.12	4.73	9.54	-	-	-
	Os01t0106900-02	74.65	87.53	20.32	143.98	125.69	131.56	-	-	-
	Os04t0379600-01	31.13	87.34	47.4	18.79	25.48	74.7	-	-	-
	Os07t0164800-01	70.07	87.32	91.07	22.59	18.71	123.68	-	-	-
	Os02t0620566-00	1.85	87.11	2.42	0.47	1.08	0.35	-	-	-
	Os11t0139700-01	38.19	86.93	77.16	30.09	27.81	13.15	-	-	-
	Os07t0507000-01	55.35	86.88	80.32	27.36	37.01	227.83	-	-	-
	Os01t0805700-02	56.28	86.73	66.49	19	24.37	45.15	-	-	-
	Os03t0183800-02	54.64	86.68	80.82	25.06	43.43	4.63	-	-	-
	Os01t0754500-02	46.83	86.68	124.82	59.76	57.56	130.46	-	-	-
	Os03t0736700-01	46.04	86.66	51.63	25.87	33.4	33.06	-	-	-
	Os02t0585200-01	7.13	86.65	706.31	58.31	15.03	124.11	-	-	-
	Os05t0560600-01	24.75	86.37	24.61	24.81	28.94	33.55	-	-	-
	Os07t0448600-00	19.56	86.32	3.92	0.22	1.03	0.14	-	-	-
	Os03t0821325-00	14.98	86.23	64.75	12.47	14.9	29.74	-	-	-
	Os04t0287400-01	34.14	86.19	119.34	75.37	68.24	85.74	-	-	-
	Os01t0840100-01	35.14	86.19	175.89	5.23	10.27	410.7	-	-	-
	Os01t0124650-01	53.32	86.18	315.71	11.83	30.63	755.93	-	-	-
	Os03t0649000-01	28.96	86.14	31.07	10.11	18.72	36.32	-	-	-
	Os05t0541200-01	47.18	86.13	25.91	59.65	69.07	111.46	-	-	-
	Os01t0157900-01	69.79	86.07	99.33	44.82	70.13	29.79	-	-	-
	Os05t0194900-01	11.93	86.04	40.41	1.3	1.11	7.5	-	-	-
	Os02t0126400-02	23.66	86.03	84.75	26.14	26.93	45.38	-	-	-
	Os05t0486100-02	20.55	86.01	72.94	5.48	12.49	25.6	-	-	-
	Os02t0829500-02	74.18	85.8	58.45	105.51	97.8	41.72	-	-	-
	Os04t0403900-00	34.68	85.79	16.03	59.85	78.2	168.8	-	-	-
	Os03t0151850-00	58.74	85.79	102.79	38.82	61.87	119.14	-	-	-
	Os01t0672400-01	52.48	85.71	72.8	62.15	55.52	87.34	-	-	-
	Os08t0108100-01	24.88	85.62	84.77	7.3	13.17	7.48	-	-	-
	Os01t0769000-01	24.01	85.62	26.76	18.29	25.9	28.32	-	-	-
	Os02t0810400-01	75.41	85.32	154.45	50.33	70.56	136.56	-	-	-
	Os03t0790900-03	64.53	85.31	63.48	53.63	38.27	59.14	-	-	-
	Os04t0390000-01	59.55	85.28	39.78	48.04	72.24	130.13	-	-	-
	Os01t0880200-03	46.56	85.23	95.44	26.33	48.4	20.4	-	-	-
	Os04t0390000-02	62.61	85.16	41.29	49.99	72.8	129.46	-	-	-
	Os02t0729801-00	62.34	85.04	81.23	202.89	386.48	334.29	-	-	-
	Os01t0248300-00	47.01	85	19.85	0.56	1.22	0.73	-	-	-
	Os06t0702700-01	70.09	84.95	50.56	392.53	181.42	35.37	-	-	-
	Os11t0592100-01	34.42	84.94	507.37	4.42	1.86	98.24	-	-	-
	Os01t0609900-01	46.1	84.85	103.75	0.99	2.51	106.38	-	-	-
	Os08t0384500-01	55.91	84.74	72.95	12.09	19.86	67.06	-	-	-
	Os01t0769000-02	27.76	84.7	28.83	22.15	27.47	20.33	-	-	-
	Os01t0348600-02	64.97	84.67	91.14	77.3	77.19	167.59	-	-	-
	Os06t0199200-01	69.39	84.6	76.73	83.23	119.46	160.94	-	-	-
	Os08t0490100-01	21.13	84.56	36.23	15.39	29.03	7.33	-	-	-
	Os04t0640900-01	38.64	84.56	42.03	23.63	16.58	46.76	-	-	-
	Os07t0170000-00	11.11	84.41	271.05	0.39	0.43	2.67	-	-	-
	Os09t0325700-01	3.75	84.4	40.88	10.35	12.85	21.39	-	-	-
	Os03t0429000-01	42.64	84.4	52.67	42.78	259.65	43.46	-	-	-
	Os02t0700600-01	74.88	84.39	19.26	24.75	49.69	13.08	-	-	-
	Os05t0375400-01	33.09	84.33	338.6	12.88	14.07	342.05	-	-	-
	Os01t0249300-01	67.33	84.29	55.39	94.99	103.18	111.66	-	-	-
	Os10t0556000-00	42.7	84.22	7.2	23.1	47.12	6.26	-	-	-
	Os01t0124700-01	44.88	84.09	282.88	10.14	30.15	779.36	-	-	-
	Os03t0823400-01	6.01	83.94	29.08	19.78	11.69	209.92	-	-	-
	Os01t0384800-01	55.54	83.94	160.24	256.04	40.81	100.88	-	-	-
	Os03t0152000-01	10.06	83.92	379.63	36.9	2.52	33.58	-	-	-
	Os05t0486100-01	19.05	83.83	72.58	5.1	12.06	24.46	-	-	-
	Os10t0370000-01	34.4	83.8	45.33	23.76	20.56	14.85	-	-	-
	Os01t0911100-01	69.43	83.76	68.59	47.36	92.28	60.78	-	-	-
	Os10t0406300-01	30.14	83.74	36.11	24.47	34.76	81.48	-	-	-
	Os06t0268700-01	58.58	83.68	88.29	39.03	93.18	50.84	-	-	-
	Os06t0712300-02	48.23	83.65	62.27	37.8	76.25	34.35	-	-	-
	Os03t0150600-02	17.71	83.58	38.68	58.22	29.83	206.58	-	-	-
	Os03t0567600-03	48.09	83.54	153.56	49.96	57.47	82.76	-	-	-
	Os03t0230300-01	15.31	83.52	370.58	4.52	8.62	72.27	-	-	-
	Os05t0545000-01	71.96	83.31	104.9	131.11	101.17	198.53	-	-	-
	Os02t0829500-03	74.16	83.26	58.94	106.8	94.74	40.41	-	-	-
	Os02t0822500-01	35.8	83.23	33.22	22.13	36.12	45.67	-	-	-
	Os04t0641400-01	53.02	83.04	43.11	30.62	63.93	37.08	-	-	-
	Os01t0920100-01	72.59	83.01	60.23	113.86	94.61	142.01	-	-	-
	Os09t0472100-01	32.24	82.95	35.68	1.43	3.53	40.43	-	-	-
	Os11t0600600-01	67.49	82.91	59.35	0.87	0.49	1.32	-	-	-
	Os02t0126400-01	22.97	82.87	82.59	25.3	26.29	44.73	-	-	-
	Os10t0162100-01	51.62	82.64	39.86	41.72	58.58	2.93	-	-	-
	Os03t0736700-03	48.64	82.53	51.68	25.74	31.62	32.48	-	-	-
	Os09t0422000-01	31.17	82.44	64.62	50.3	96.3	64.17	-	-	-
	Os03t0102700-01	30.96	82.41	2.6	0.56	12.95	2.79	-	-	-
	Os07t0257200-01	48.51	82.33	15.44	1.75	2.15	0.08	-	-	-
	Os10t0203000-01	20.56	82.23	28.72	23.55	56.09	9.82	-	-	-
	Os02t0653900-03	18.34	82.22	22.2	27.53	53.33	28.02	-	-	-
	Os01t0685400-01	9.1	82.21	122.53	2.14	1.08	7.12	-	-	-
	Os04t0403200-01	41.89	82.03	53.43	25.6	77.44	12.26	-	-	-
	Os09t0400400-01	40.33	81.98	179.83	0.12	0.51	8.24	-	-	-
	Os01t0112500-02	36.95	81.66	73.76	19.44	24.1	53.26	-	-	-
	Os05t0135400-01	10.63	81.42	159.32	0.06	0.3	1.92	-	-	-
	Os06t0288100-01	14.8	81.38	34.08	54.86	48.95	93.64	-	-	-
	Os12t0636200-01	54.33	81.35	54.76	30.06	42.49	52.57	-	-	-
	Os03t0264400-02	70.64	81.31	368.78	26.87	36.93	171.3	-	-	-
	Os03t0306700-01	35.6	81.3	7.4	0.29	0.16	0.05	-	-	-
	Os12t0263000-01	57.85	81.22	27.9	129.16	120.88	17.33	-	-	-
	Os08t0428800-00	54.57	81.2	44.74	36.01	27.05	59.78	-	-	-
	Os02t0131100-01	23.71	81.19	19.23	15.3	29.68	87.47	-	-	-
	Os04t0457800-02	58.94	81.16	67.28	89.44	91.38	122.89	-	-	-
	Os04t0395600-01	71.29	81.06	34.07	20.18	21.66	37.65	-	-	-
	Os06t0214850-00	42.08	81.05	91.37	31.06	56.54	38.34	-	-	-
	Os01t0739200-01	30.13	80.71	22.9	25.44	24.58	24.01	-	-	-
	Os11t0572500-01	61.82	80.57	94.35	64.91	64.35	48.31	-	-	-
	Os01t0591300-02	44.1	80.55	44.08	14.12	13.84	4.75	-	-	-
	Os02t0692700-01	40.39	80.53	101.04	56.46	64.83	57.53	-	-	-
	Os07t0491600-01	61.76	80.33	67.96	39.76	45.38	58.2	-	-	-
	Os12t0637100-01	21.56	80.31	32.8	25.78	26.75	46.49	-	-	-
	Os01t0818600-02	58.45	80.23	84.05	27.23	30.74	13.38	-	-	-
	Os02t0224100-02	41.73	80.22	23.68	15.17	32.07	38.33	-	-	-
	Os04t0531600-01	40.22	80.15	80.77	14.1	13.43	39.12	-	-	-
	Os04t0492400-02	34.79	80.08	199.25	107.3	58.03	51.73	-	-	-
	Os01t0356400-01	36.86	80.07	39.72	29.22	54.69	163.46	-	-	-
	Os06t0712300-01	36.66	80.03	51.54	23.75	68.46	64.91	-	-	-
	Os01t0805700-01	51.32	79.96	61.38	17.26	22.48	42.18	-	-	-
	Os04t0466600-01	63.84	79.95	52.97	62.18	53.12	59.61	-	-	-
	Os05t0179100-01	16.19	79.94	55.22	4.33	7.2	10.3	-	-	-
	Os08t0239300-01	57.91	79.87	4.82	1.78	5.17	0.08	-	-	-
	Os02t0822500-05	44.86	79.74	39.79	37.54	37.04	28.83	-	-	-
	Os03t0790900-02	34.63	79.49	43.46	26.21	30.44	75.17	-	-	-
	Os10t0564500-02	44.67	79.44	29.34	30.4	26.57	35.59	-	-	-
	Os04t0509500-01	9.91	79.32	17.79	10.03	14.27	72.67	-	-	-
	Os06t0660800-01	40.12	79.19	69.07	55.2	36.26	71.24	-	-	-
	Os07t0459400-01	55.73	79.17	59.7	28.24	44.75	85.96	-	-	-
	Os01t0106900-01	67.11	79.17	18.34	129.15	113.85	120	-	-	-
	Os03t0639600-01	56.77	78.97	111.75	54.16	48.24	98.19	-	-	-
	Os10t0203000-02	22.4	78.92	25.89	27.01	55.89	8.16	-	-	-
	Os05t0162000-01	23.75	78.91	22.55	0.09	0.24	2.62	-	-	-
	Os09t0558050-00	36.77	78.9	29.42	40.49	65.41	30.26	-	-	-
	Os12t0636300-00	41.39	78.87	44.09	23.79	38.71	34.21	-	-	-
	Os03t0790900-04	37.6	78.87	45.45	28.56	30.73	73.16	-	-	-
	Os04t0531500-01	39.72	78.82	79.04	13.77	13.13	38.16	-	-	-
	Os10t0161800-00	24.03	78.73	67.93	41.1	115.26	39.96	-	-	-
	Os01t0900800-01	48.17	78.71	42.29	39.56	96.68	66.17	-	-	-
	Os08t0489300-01	39.75	78.61	11.86	6.79	87.73	5.81	-	-	-
	Os02t0807000-01	45.23	78.5	73.86	3.62	2.7	24.18	-	-	-
	Os11t0498600-01	36.68	78.44	60.6	17.34	21.23	1.73	-	-	-
	Os12t0620400-03	38.29	78.43	24.88	107.01	142.37	177.98	-	-	-
	Os04t0493100-01	26.29	78.43	39.86	127.99	247.98	51.72	-	-	-
	Os10t0527601-00	13.06	78.4	56.8	0.55	0.44	17.88	-	-	-
	Os07t0616500-01	48.1	78.3	26.14	95.78	57.26	14.56	-	-	-
	Os08t0455800-02	54.92	78.21	55.18	42.73	36.77	60.12	-	-	-
	Os01t0118700-01	27.18	78.18	122.01	10.55	20.36	97.87	-	-	-
	Os02t0730725-00	51.54	78.16	76.65	42.51	60.03	105.09	-	-	-
	Os01t0823150-00	31.98	78.15	8.35	6.06	36.82	3.59	-	-	-
	Os06t0726200-02	56.01	78.12	171.24	3.69	4.76	233.03	-	-	-
	Os01t0794100-01	20.86	77.99	45.21	20.02	21.81	10.75	-	-	-
	Os05t0361500-01	42.06	77.97	145.99	0.62	1.04	4.09	-	-	-
	Os03t0738350-00	15.79	77.88	5.98	30.35	283.67	166.72	-	-	-
	Os02t0129800-01	2.16	77.8	661.51	17.22	28.34	155.5	-	-	-
	Os04t0382300-03	56.22	77.79	54.78	28.99	32.25	43.52	-	-	-
	Os11t0588300-02	51.39	77.73	86.09	66.76	68.33	144.47	-	-	-
	Os04t0606400-01	69.26	77.72	60.2	32.43	47.73	67.4	-	-	-
	Os04t0674000-01	25.02	77.71	68.69	75.06	52.32	68.38	-	-	-
	Os01t0627600-01	22.65	77.62	46.35	0.59	0.14	1.97	-	-	-
	Os11t0588300-01	50.22	77.59	84.24	65.48	68.3	143.71	-	-	-
	Os01t0723450-00	22.45	77.58	13.02	19.35	45.97	132.76	-	-	-
	Os01t0699100-01	8.76	77.39	8.56	2	6.25	8.28	-	-	-
	Os03t0649050-00	26.19	77.28	27.7	8.56	16.49	31.13	-	-	-
	Os01t0132766-01	32.37	77.2	65.66	2.52	2.01	0.88	-	-	-
	Os02t0634500-01	53.79	77.14	199.63	598.68	573	606.55	-	-	-
	Os02t0205500-01	24.38	76.94	36.54	18.77	11.57	46.78	-	-	-
	Os04t0492400-01	32.1	76.85	190.01	100.88	54.11	49.39	-	-	-
	Os04t0592600-01	36.68	76.82	67.77	39.86	74.07	27.71	-	-	-
	Os06t0247651-00	55.42	76.63	15.71	12.45	17.53	6.06	-	-	-
	Os02t0471500-02	43.7	76.63	56.71	18.51	52.48	58.62	-	-	-
	Os07t0695800-01	67.71	76.61	32.76	7.16	9.3	18	-	-	-
	Os04t0659100-03	51.68	76.59	22.42	1236.03	1741.63	986.61	-	-	-
	Os05t0149450-00	47.42	76.53	69.34	26.91	138.26	133.65	-	-	-
	Os09t0454600-00	30.05	76.5	139.66	9.83	8.35	81.4	-	-	-
	Os06t0248500-00	2.77	76.48	40.26	6.52	9.05	16.19	-	-	-
	Os10t0406350-00	22.24	76.43	29.11	16.89	30.68	54.27	-	-	-
	Os01t0881500-02	45.44	76.34	144.18	48.54	36.86	130.3	-	-	-
	Os05t0227600-00	62.26	76.33	125.96	187.77	521.22	73.64	-	-	-
	Os04t0110100-01	6.6	76.33	165.5	0.14	0.31	2.26	-	-	-
	Os02t0259100-02	53.76	76.27	70.72	34.03	28.72	54.84	-	-	-
	Os01t0823100-01	40.68	76.27	10.72	6.78	35	3.59	-	-	-
	Os11t0168300-03	61.59	76.23	63.17	68.55	83.08	118.51	-	-	-
	Os07t0119300-01	20.34	76.21	93.52	14.1	70.8	52.86	-	-	-
	Os11t0542100-01	11.21	76.18	62.29	1.2	4.38	0.86	-	-	-
	Os11t0171500-01	57.28	76.15	84.05	84.91	82.87	42.51	-	-	-
	Os10t0532300-01	39.11	76.15	49.57	46.81	38.78	111.03	-	-	-
	Os02t0175100-01	51.43	76.01	66.95	15.1	21.98	17.27	-	-	-
	Os03t0293500-01	59.49	75.99	13	9.26	24.69	11.91	-	-	-
	Os01t0881500-01	44.96	75.92	143	48.07	36.74	131.28	-	-	-
	Os10t0531400-01	26.03	75.88	68.19	37.83	44.04	222.39	-	-	-
	Os03t0160200-01	61.57	75.81	38.43	34.69	61.98	58.12	-	-	-
	Os01t0100900-01	56.77	75.8	69.73	57.71	62.28	214.25	-	-	-
	Os07t0448300-00	12.65	75.78	1.28	0.03	0	0.05	-	-	-
	Os10t0140700-00	5.06	75.71	7.15	3.41	22.02	2.93	-	-	-
	Os01t0817633-01	3.09	75.42	12.72	2.03	1.39	1.91	-	-	-
	Os01t0949500-01	25.2	75.41	21.8	57.13	77.89	28.06	-	-	-
	Os02t0809700-01	13.56	75.34	16.87	0.26	0.77	0.9	-	-	-
	Os01t0210550-00	19.82	75.33	21.07	26.25	109.85	42.37	-	-	-
	Os02t0119400-01	52.01	75.29	82.98	45.62	47.07	111.55	-	-	-
	Os12t0162100-01	47.88	75.26	37.48	9.16	15.27	59.18	-	-	-
	Os04t0659100-01	50.4	75.25	21.99	1202	1717.88	959.94	-	-	-
	Os01t0880200-01	38.58	75.25	80.22	21.67	42.31	18.68	-	-	-
	Os03t0239200-02	47.11	75.13	60.49	26.08	28.2	46.31	-	-	-
	Os03t0859700-00	54.1	74.9	19.89	4.64	11.42	77.92	-	-	-
	Os03t0700700-03	45.91	74.9	54.34	9.36	37.68	180.62	-	-	-
	Os03t0239200-03	47.66	74.87	60.83	26.38	28.18	46.84	-	-	-
	Os06t0506850-00	31.33	74.79	245.36	50.18	76.01	500.54	-	-	-
	Os06t0171900-01	51.21	74.78	78.27	64.11	63.73	187.2	-	-	-
	Os08t0455800-01	52.57	74.76	53.49	40.78	35.09	58.77	-	-	-
	Os11t0549665-01	56.1	74.74	21.34	16.27	42.84	35.61	-	-	-
	Os01t0130100-01	47.94	74.73	46.44	8.53	14.05	65.85	-	-	-
	Os02t0562350-00	54.32	74.72	40.18	64.63	76.33	74.44	-	-	-
	Os09t0484800-01	8.89	74.68	17.09	18.21	15.11	16.02	-	-	-
	Os07t0236800-01	61.8	74.67	50.2	62.56	57.18	80.07	-	-	-
	Os10t0392400-01	39.84	74.59	294.79	51.25	73.52	129.76	-	-	-
	Os03t0700700-04	48.05	74.59	55.76	9.86	38.58	175.46	-	-	-
	Os05t0410200-01	42.87	74.41	99.65	31.66	74.47	109.94	-	-	-
	Os03t0124300-01	41.77	74.4	92.97	58.73	66.53	67.53	-	-	-
	Os07t0176900-01	58.51	74.35	60.91	520.46	628.6	255.54	-	-	-
	Os02t0601800-01	62.19	74.35	55.71	48.05	56.86	114.21	-	-	-
	Os04t0674000-02	22.57	74.33	64.23	68.86	50.3	73.68	-	-	-
	Os11t0168300-02	56.36	74.29	56.72	61.45	79.49	125.67	-	-	-
	Os01t0295700-01	12.78	74.29	94.35	62.54	34.65	40.33	-	-	-
	Os03t0700750-00	43.12	74.22	53.47	9.93	37.55	209.85	-	-	-
	Os12t0285100-04	53.04	74.21	34.65	92.23	196.52	54.15	-	-	-
	Os08t0526400-01	18.69	74.2	72.52	18.42	33.5	88.27	-	-	-
	Os01t0187400-01	41.96	74.04	36.3	13.37	20.52	30.56	-	-	-
	Os03t0381300-01	50.54	73.99	103.55	61.92	68.79	223.2	-	-	-
	Os09t0400700-01	5.15	73.9	238.71	43.31	65.63	89.06	-	-	-
	Os03t0132250-00	17.5	73.88	22.73	10.69	22.39	42.58	-	-	-
	Os09t0322000-03	26.95	73.86	76.72	23.95	22.6	76.64	-	-	-
	Os03t0645900-00	0.7	73.77	2.2	2.08	4.6	0.9	-	-	-
	Os04t0559200-03	51.93	73.74	31.78	12.04	24.67	9.57	-	-	-
	Os06t0725100-01	16.92	73.71	113.88	0.03	0.07	0.03	-	-	-
	Os05t0591900-05	49.68	73.63	121.56	239.58	161.13	180.83	-	-	-
	Os01t0818600-01	49.42	73.62	75.81	20.07	25.83	16.13	-	-	-
	Os04t0650333-00	35.22	73.55	34.88	12.77	39.84	19.6	-	-	-
	Os03t0124300-02	49.43	73.55	100.13	67.02	67.22	63.07	-	-	-
	Os01t0112500-01	26.25	73.55	64.12	13.52	20.68	47.61	-	-	-
	Os01t0772600-02	63.89	73.48	55.41	45.95	52.49	71.39	-	-	-
	Os01t0978100-01	55.31	73.41	34.7	231.67	279.77	231.84	-	-	-
	Os01t0214600-01	53.41	73.4	21.05	33.15	66.97	3.26	-	-	-
	Os11t0168300-01	55.29	73.31	55.63	60.38	78.27	123.96	-	-	-
	Os07t0585000-01	39	73.29	59.82	40.06	47.65	72.87	-	-	-
	Os01t0960400-02	36.83	73.18	110.21	30.25	36.45	39.37	-	-	-
	Os01t0956200-01	15.02	73.17	54.72	15.74	21.95	49.31	-	-	-
	Os03t0402800-02	61.7	73.15	252.73	86.56	89.99	80.56	-	-	-
	Os08t0190100-01	58.43	73	390.24	0	0.2	15.94	-	-	-
	Os02t0471500-01	41.49	72.94	56.46	17.59	49.84	56.22	-	-	-
	Os11t0666200-00	28.05	72.92	43.84	0.78	0.6	13.33	-	-	-
	Os11t0251400-02	64.8	72.92	40.51	67.7	98.22	147.21	-	-	-
	Os01t0874300-01	9.45	72.91	104.61	29.55	24.76	24.37	-	-	-
	Os03t0180100-01	48.83	72.58	35.32	15.52	54.26	44.97	-	-	-
	Os03t0568000-00	36.36	72.55	127.06	39.1	49.05	74.71	-	-	-
	Os06t0223700-01	27.8	72.53	66.77	21.95	15.53	30.46	-	-	-
	Os03t0425200-01	55.82	72.4	26.94	129.38	168.21	76.27	-	-	-
	Os03t0425200-02	56.89	72.37	27.4	132.33	170.95	77.78	-	-	-
	Os08t0189200-01	50.78	72.33	228.63	2.23	5.37	24.29	-	-	-
	Os01t0833400-02	14.06	72.31	35.81	32.91	17.25	10.78	-	-	-
	Os05t0449500-01	40.83	72.27	35.69	36	44.3	82.67	-	-	-
	Os02t0782900-01	32.16	72.21	6.48	0.18	0.24	0.59	-	-	-
	Os01t0264700-01	50.14	72.2	46.36	24.11	26.78	42.88	-	-	-
	Os03t0183800-01	40.74	72.19	61.19	18.31	34.47	4.19	-	-	-
	Os04t0395600-02	63.29	72.14	29.53	14.7	17.91	37.19	-	-	-
	Os01t0880250-00	39.37	72.1	82.92	22.12	40.03	18.35	-	-	-
	Os04t0444250-00	54.72	72	62.05	39.07	50.63	91.99	-	-	-
	Os05t0437900-03	47.42	71.9	58.43	12.64	20.6	20.84	-	-	-
	Os02t0601800-03	58.54	71.9	56.14	45.45	53.69	108.73	-	-	-
	Os01t0865100-01	57.58	71.9	81.7	26.45	37.55	71.4	-	-	-
	Os07t0467200-01	42.77	71.87	26.39	222.12	327.67	43.42	-	-	-
	Os09t0258000-02	50.49	71.86	67.49	47.37	58.4	108.05	-	-	-
	Os06t0608800-04	36.87	71.81	149.3	65.93	58.28	272.21	-	-	-
	Os02t0584700-01	20.9	71.8	382.14	62.61	13.37	68.41	-	-	-
	Os03t0339400-01	41.41	71.79	185.07	0.14	0.03	2.13	-	-	-
	Os11t0540100-01	52.78	71.65	37.84	0.53	0.31	0.41	-	-	-
	Os02t0631200-02	53.31	71.62	107.09	33.19	32.01	58.33	-	-	-
	Os04t0614600-02	58.2	71.58	88.03	87.35	108.09	314.76	-	-	-
	Os02t0822400-01	55.6	71.55	61.85	44.86	50.93	60.8	-	-	-
	Os05t0595100-01	4.33	71.49	83.26	5.73	7.09	41.63	-	-	-
	Os03t0321800-01	31.69	71.48	43.38	2.57	4.18	10.46	-	-	-
	Os09t0346400-01	63.29	71.47	33.34	24.51	40.9	99.97	-	-	-
	Os08t0364900-00	20.35	71.47	42.4	44.64	96.46	80.56	-	-	-
	Os03t0239200-04	46.21	71.46	59	25.73	27	44.81	-	-	-
	Os12t0244100-02	60.74	71.45	73.26	71.85	95.05	91.86	-	-	-
	Os01t0754500-01	33.81	71.39	92.53	41.33	46.46	101.14	-	-	-
	Os05t0432400-02	60.04	71.37	44.74	37.69	48.2	69.93	-	-	-
	Os10t0523700-01	34.26	71.25	65.84	67.88	210.77	139.44	-	-	-
	Os08t0176900-02	54.16	71.14	51.56	14.23	16.62	34.4	-	-	-
	Os02t0658850-00	18.85	71.12	2.24	2.19	8.49	0	-	-	-
	Os03t0332566-00	24.61	71.09	3.36	0.08	0.21	0.02	-	-	-
	Os04t0452000-01	45.29	71.06	76.09	49.79	63.95	56.41	-	-	-
	Os03t0790900-01	28.58	71.04	37.85	21.27	26.92	69.27	-	-	-
	Os01t0566500-01	52.97	70.99	12.73	1.09	1.83	0.52	-	-	-
	Os11t0186900-01	8.86	70.95	8.26	0.02	0.09	0.03	-	-	-
	Os01t0778800-01	44.22	70.92	113.34	6.72	14.01	125.64	-	-	-
	Os07t0687700-01	57.84	70.81	55.7	42	45.32	142.84	-	-	-
	Os03t0264400-01	57.74	70.75	305.78	22.21	31.7	157.29	-	-	-
	Os01t0185200-03	48.52	70.34	34.68	47.67	48.92	46.34	-	-	-
	Os09t0322000-02	25.42	70.19	71.15	22.18	21.29	71.5	-	-	-
	Os07t0471900-00	38.19	70.18	20.25	9.23	6.17	3.99	-	-	-
	Os01t0871200-03	52.18	70.06	33.62	84.27	79.23	178.81	-	-	-
	Os01t0908200-01	47.16	69.98	39.86	80.02	69.94	96.53	-	-	-
	Os03t0819600-01	48.4	69.95	21.83	178.52	269.12	6.83	-	-	-
	Os03t0239200-01	42.73	69.92	56.21	24.49	26.24	42.09	-	-	-
	Os02t0180000-01	51.39	69.86	39.15	30.72	39.48	15.39	-	-	-
	Os01t0131300-01	44.01	69.85	71.75	92.9	149.62	134.52	-	-	-
	Os03t0680800-04	61.19	69.7	90.22	142.79	124.55	175.63	-	-	-
	Os03t0773800-02	60.32	69.6	57.53	2103.79	1769.71	463.16	-	-	-
	Os05t0437900-01	33.25	69.59	42.1	8.2	17.8	22.42	-	-	-
	Os06t0192800-01	12.77	69.56	96.48	4.77	3.5	36.83	-	-	-
	Os04t0463500-01	50.55	69.46	322.54	106.79	126.01	87.39	-	-	-
	Os08t0155550-00	43.93	69.42	41.41	31.93	51.09	53.85	-	-	-
	Os10t0574750-01	25.15	69.38	194.67	35.74	31.49	85.85	-	-	-
	Os03t0318600-01	49.08	69.16	107.46	36.58	42.96	111.52	-	-	-
	Os02t0790500-02	19.42	69.11	93.7	25.33	11.03	71.46	-	-	-
	Os08t0516900-01	31.58	69.09	123.37	26.86	17.55	71.4	-	-	-
	Os03t0819600-02	46.77	68.97	21.39	178.81	264.09	7.02	-	-	-
	Os06t0247800-01	52.64	68.95	46.02	30.51	47.97	59.59	-	-	-
	Os05t0486150-01	16.45	68.95	61.69	5.37	11.11	18.99	-	-	-
	Os10t0440500-00	38.27	68.93	246.87	6.22	8.91	259.74	-	-	-
	Os03t0187600-01	30.61	68.77	195.86	66.72	69.81	66.44	-	-	-
	Os08t0545200-01	31.52	68.58	79.02	436.86	306.55	238.02	-	-	-
	Os02t0205700-00	15.19	68.58	27.44	13.22	10.16	35.39	-	-	-
	Os05t0213500-01	34.94	68.57	78.95	54.27	65.95	37.16	-	-	-
	Os04t0650366-00	32.75	68.55	32.18	12	37.15	17.96	-	-	-
	Os04t0311400-01	43.63	68.45	88.65	23.23	52.36	68.28	-	-	-
	Os02t0541300-00	33.63	68.4	144.95	18.55	39.55	48.3	-	-	-
	Os08t0446750-00	27.03	68.39	36.9	5.06	14.03	1.13	-	-	-
	Os07t0693600-01	49	68.36	52.77	23.11	43.02	30.24	-	-	-
	Os03t0322200-01	27.75	68.31	201.87	2.46	2.82	54.83	-	-	-
	Os03t0331700-01	48.16	68.28	106.51	13.27	14.48	58.11	-	-	-
	Os03t0281600-01	50.8	68.25	35.24	13.23	28.36	89.42	-	-	-
	Os01t0142500-01	35.26	68.23	178.01	15.09	20.69	26.99	-	-	-
	Os07t0515100-02	58.68	68.13	53.52	61.53	73.42	70.31	-	-	-
	Os07t0677200-02	34.6	68.11	34.64	16.94	69.66	2318.3	-	-	-
	Os08t0137800-01	10.87	68.09	378.01	0.35	0.34	29.53	-	-	-
	Os04t0415000-01	33.97	68.06	133.92	11.93	15.86	12.4	-	-	-
	Os06t0196900-02	54.24	68.05	23.57	81.29	120.5	149.44	-	-	-
	Os12t0636200-02	28.83	68	33.59	16.07	34.66	42.52	-	-	-
	Os04t0550900-00	17.1	68	2.91	0.06	0.11	0	-	-	-
	Os09t0456800-01	30.97	67.99	55.24	11.45	18.47	33.46	-	-	-
	Os03t0374500-00	4.54	67.95	23.54	0.15	0.16	0.5	-	-	-
	Os10t0159800-03	20.85	67.9	14.21	28.41	40.47	16.43	-	-	-
	Os01t0755700-01	27.44	67.88	33.45	5.81	5.95	8.07	-	-	-
	Os01t0775200-02	20.3	67.81	19.33	6.87	16.92	13.28	-	-	-
	Os03t0279400-01	44.75	67.75	9.09	8.98	9.81	16.9	-	-	-
	Os04t0474900-01	38.81	67.7	18.97	15.33	17.93	77.6	-	-	-
	Os05t0182550-00	48.76	67.68	41.95	66.26	79.9	45.9	-	-	-
	Os11t0187001-00	3.56	67.65	5.41	0.04	0.08	0.02	-	-	-
	Os10t0139700-01	5.8	67.63	101.4	1.06	1.63	31.46	-	-	-
	Os12t0131100-01	42.42	67.61	127.77	22.05	35.25	43.8	-	-	-
	Os03t0214200-01	20.93	67.6	15.3	6.72	17.36	12.77	-	-	-
	Os07t0249700-01	47.22	67.56	65.38	43.21	53.51	46.97	-	-	-
	Os10t0405600-01	26.5	67.53	35.4	16.92	22.49	24.87	-	-	-
	Os08t0446800-01	37.47	67.53	42.05	7.15	13.9	1.1	-	-	-
	Os05t0163700-01	51.58	67.5	95.46	38.25	36.24	150.63	-	-	-
	Os10t0370800-01	36.85	67.44	24.05	3.77	4.84	4.47	-	-	-
	Os03t0401100-01	22.94	67.39	3.99	27.95	13.78	227.42	-	-	-
	Os03t0405900-01	52.01	67.38	135.64	10.63	14.97	43.62	-	-	-
	Os02t0669366-00	33	67.36	87.97	4.91	4.6	25.11	-	-	-
	Os12t0116400-00	23.62	67.31	33.19	5.66	4.48	9.02	-	-	-
	Os03t0266900-01	3.41	67.23	730.5	5.38	6.4	296.03	-	-	-
	Os02t0259100-01	48.56	67.19	63.86	31.61	25.03	39.44	-	-	-
	Os02t0575000-01	21.27	67.16	711.04	19.01	10.98	249	-	-	-
	Os01t0775200-03	20.38	67.14	19.16	6.97	16.7	13.14	-	-	-
	Os01t0895300-01	17.53	67.03	27.72	0.11	0.05	0.03	-	-	-
	Os09t0467700-01	41.17	67.02	62.36	22.21	30.85	19.54	-	-	-
	Os12t0244100-01	55.26	67.01	69.15	64.98	88.44	85.31	-	-	-
	Os03t0278400-01	52.48	66.9	46	32.78	48.47	47.84	-	-	-
	Os02t0658800-01	22.01	66.88	2.08	1.98	7.63	0.04	-	-	-
	Os02t0204700-00	10.42	66.87	30.12	0.65	1.11	0.7	-	-	-
	Os02t0721700-02	45.17	66.84	36.44	76.75	152.42	18.12	-	-	-
	Os01t0674000-01	19.29	66.84	16.04	14.93	20.67	20.6	-	-	-
	Os10t0398100-01	38.81	66.77	9.1	0.64	0.66	0.03	-	-	-
	Os03t0700700-02	35.1	66.76	43.28	6.65	30.99	194.84	-	-	-
	Os03t0696300-02	49.45	66.73	34.24	48.01	24.98	23.75	-	-	-
	Os05t0522500-01	49.95	66.71	63.53	26.69	46.63	59.49	-	-	-
	Os10t0524700-00	11.36	66.58	9.37	0.49	0.41	0.85	-	-	-
	Os01t0749400-01	28.51	66.5	29.36	14.93	16.67	45.06	-	-	-
	Os12t0278800-02	55.9	66.49	47.66	18.26	21.94	66.65	-	-	-
	Os11t0506700-00	0.42	66.43	51.92	0.17	0.42	14.48	-	-	-
	Os04t0382300-02	40.63	66.41	40.58	21.79	25.79	38.08	-	-	-
	Os03t0358100-01	48.93	66.33	128.95	120.97	116.99	155.73	-	-	-
	Os08t0250900-01	20.88	66.19	52.04	66.77	115.45	72.45	-	-	-
	Os07t0557100-01	36.25	66.08	55.73	64.3	86.87	64.41	-	-	-
	Os03t0367900-02	52.9	66.06	49.05	73.79	91.28	97.48	-	-	-
	Os06t0168500-01	32.74	66.04	188.44	29	21.52	170.44	-	-	-
	Os02t0822500-02	15.56	65.97	17.41	7.2	26.31	52.79	-	-	-
	Os01t0175100-01	23.01	65.93	46.14	265.01	151.38	113.64	-	-	-
	Os06t0126000-04	45.53	65.79	47.27	45.25	69.91	40.04	-	-	-
	Os03t0374551-00	3.94	65.76	22.57	0.2	0.16	0.55	-	-	-
	Os04t0382300-01	43.21	65.73	42.22	22.46	27.06	37.27	-	-	-
	Os02t0595900-00	12.41	65.72	1.13	0.12	0.13	0.08	-	-	-
	Os12t0210400-01	14.5	65.71	36.04	16.38	52.76	92.89	-	-	-
	Os06t0608800-01	32.43	65.68	134.12	59.01	53.49	247.53	-	-	-
	Os07t0154201-00	0.46	65.67	150.3	0.7	0.72	4.56	-	-	-
	Os03t0747850-00	53.24	65.61	31.03	10.47	14.16	5.4	-	-	-
	Os02t0517531-01	46.11	65.54	58.57	21.14	37.1	39.31	-	-	-
	Os01t0605100-01	33.54	65.48	91.18	9.98	11.69	85.3	-	-	-
	Os06t0644200-02	15.64	65.41	40.39	8.49	64.39	71.9	-	-	-
	Os07t0559700-00	32.97	65.39	83.41	52.08	73.5	70.28	-	-	-
	Os11t0703400-02	35.47	65.37	216.56	41.32	38.82	101	-	-	-
	Os03t0567600-01	30.7	65.36	102.09	31.83	47.86	85.94	-	-	-
	Os12t0278800-03	54.93	65.33	47.73	18.36	21.71	64.78	-	-	-
	Os07t0483500-03	18.42	65.3	44.7	33.44	53.69	96.02	-	-	-
	Os08t0465800-02	31.11	65.27	31.44	42.69	102.76	24.37	-	-	-
	Os02t0577100-01	53.17	65.24	46.63	77.88	63.37	15.46	-	-	-
	Os03t0299400-00	14.06	65.03	136.35	27.52	21.27	180.04	-	-	-
	Os08t0112500-02	43.32	65	90.87	17.55	20.62	41.58	-	-	-
	Os04t0614600-01	47.1	64.99	70.35	68.91	95.32	293.19	-	-	-
	Os05t0278550-00	6.03	64.98	3.34	0.16	0.4	5.71	-	-	-
	Os03t0703200-01	43.21	64.96	25.23	51.61	49.27	69.72	-	-	-
	Os10t0401000-01	15.39	64.93	61.51	10.07	5.28	24.92	-	-	-
	Os05t0256500-00	38.16	64.82	28.33	5.07	7.35	10.7	-	-	-
	Os07t0501900-03	49.58	64.81	56.91	27.33	38.95	82.61	-	-	-
	Os02t0293400-01	55.83	64.79	65.95	23.37	27.83	44.84	-	-	-
	Os10t0552600-01	47.15	64.76	3.18	0.23	0.33	0.02	-	-	-
	Os07t0483500-02	18	64.75	44.97	32.58	52.68	94.27	-	-	-
	Os07t0501900-02	57.68	64.74	63.11	39.05	41.5	64.59	-	-	-
	Os03t0367900-01	54.89	64.64	50.96	76.97	90.91	98.08	-	-	-
	Os02t0823000-01	56.59	64.63	66.79	66.61	67.51	104.49	-	-	-
	Os01t0609300-01	41.27	64.6	84.95	5.87	6.1	223.26	-	-	-
	Os11t0484700-00	44.17	64.59	0.78	2.08	0.81	0	-	-	-
	Os02t0721700-01	43.1	64.55	34.75	73.04	148.17	18.43	-	-	-
	Os01t0652800-01	36.35	64.55	15.05	4.66	11.63	0.61	-	-	-
	Os04t0530500-01	46.42	64.32	23.78	25.08	20.35	13.72	-	-	-
	Os08t0177000-01	46.44	64.26	56.49	12.06	15.07	16.7	-	-	-
	Os04t0677300-01	17.17	64.23	282.52	1.87	1.49	11.72	-	-	-
	Os06t0196900-01	43.61	64.2	14.95	58.31	105.98	69.73	-	-	-
	Os09t0425900-01	19.97	64.19	163.16	123.78	46.29	96.57	-	-	-
	Os01t0956300-01	9.89	64.17	41.12	10.47	18.22	43.64	-	-	-
	Os12t0617400-01	3.22	64.16	37.84	3.98	7.72	2.48	-	-	-
	Os04t0637000-02	57.34	64.16	78.34	21.17	13.73	21.21	-	-	-
	Os07t0446100-02	54.34	64.1	142.41	31.66	28.61	22.15	-	-	-
	Os01t0919600-02	38.24	64.05	51.67	138.75	124.16	93.06	-	-	-
	Os08t0420700-01	35.06	64.01	53.83	4.37	6.97	37.01	-	-	-
	Os01t0830700-02	47.61	63.96	54.99	8.91	20.45	64.26	-	-	-
	Os04t0475600-01	43.12	63.95	86.22	8.38	8.91	46.36	-	-	-
	Os06t0196900-03	52.79	63.93	22.48	78.73	112.87	137.83	-	-	-
	Os01t0949900-01	32.62	63.91	423.35	2.26	1.63	20.16	-	-	-
	Os01t0960400-01	28.17	63.77	89.95	22.01	29.57	31.79	-	-	-
	Os10t0565100-00	37.02	63.74	56.45	34.19	44.12	39.08	-	-	-
	Os06t0651000-01	32.35	63.7	52.49	18.16	28.04	94.56	-	-	-
	Os06t0199200-03	47.21	63.67	57.5	59.73	86.2	112.71	-	-	-
	Os04t0679800-01	40.15	63.66	37.49	23.09	23.39	30.98	-	-	-
	Os02t0713700-01	31.21	63.65	44.68	0.96	0.77	6.39	-	-	-
	Os02t0149800-01	49.31	63.61	86.44	68.41	82.76	225.3	-	-	-
	Os03t0572050-00	20.74	63.57	70.99	24.82	25.25	59.43	-	-	-
	Os10t0580900-02	44.44	63.49	70.89	28.9	24.49	82.88	-	-	-
	Os06t0126000-05	47.07	63.46	47.78	49.38	69.4	39.38	-	-	-
	Os03t0327100-01	10.97	63.45	134.84	26.94	12.81	39.6	-	-	-
	Os01t0556201-00	52.09	63.36	55.19	48.7	54.03	47.93	-	-	-
	Os01t0118033-00	39.53	63.3	21.2	3.99	10.09	12.97	-	-	-
	Os11t0703400-01	34.9	63.28	210.44	40.47	37.76	97.29	-	-	-
	Os08t0448000-01	34.74	63.28	127.99	4.38	6.99	60.12	-	-	-
	Os11t0174000-02	31.66	63.22	9.9	3.81	19.49	32.32	-	-	-
	Os04t0560700-01	45.56	63.21	157.31	46.04	37.21	153.68	-	-	-
	Os03t0700700-01	32.28	63.2	41.26	6.04	29.06	202.04	-	-	-
	Os01t0296166-00	21.6	63.16	20.88	3.05	5.43	2.64	-	-	-
	Os04t0390000-03	24.97	63.14	14.97	12.04	45.18	108.94	-	-	-
	Os11t0585900-01	30.76	63.09	40.15	20.05	23.93	25.64	-	-	-
	Os07t0483500-01	17.57	63.08	44.13	31.67	51.13	91.76	-	-	-
	Os01t0893400-02	9.22	63.08	12.46	44.63	43.63	4.58	-	-	-
	Os01t0775200-01	19.03	63.07	18.19	6.47	15.78	12.49	-	-	-
	Os03t0773800-01	51.83	63.05	49.7	1783.22	1501.78	398.94	-	-	-
	Os03t0645966-00	0.7	63.04	2.01	1.92	3.63	0.75	-	-	-
	Os12t0278800-01	52.7	62.91	46.1	17.52	20.9	62.28	-	-	-
	Os07t0515100-01	53.08	62.91	48.37	54.35	65.11	62.81	-	-	-
	Os04t0102700-01	47.77	62.91	31.14	20.73	22.4	52.2	-	-	-
	Os08t0157900-01	49.98	62.9	363.98	47.99	36.64	88.09	-	-	-
	Os01t0830700-01	47.03	62.88	54.15	8.73	20.33	63.06	-	-	-
	Os06t0603600-01	23.19	62.86	22	18.15	16.2	27.96	-	-	-
	Os03t0351100-02	37.99	62.8	94.73	86.7	68.33	126.53	-	-	-
	Os03t0187500-01	42.44	62.78	27.21	9.9	7.94	4.27	-	-	-
	Os01t0740500-00	51.74	62.78	8.66	7.53	5.56	8.82	-	-	-
	Os01t0971800-00	37	62.76	50.08	415.7	280.77	18.58	-	-	-
	Os12t0128700-01	26.41	62.74	35.13	31.19	38.77	210.18	-	-	-
	Os06t0199200-02	51.67	62.72	59.31	62.44	87.17	121.13	-	-	-
	Os06t0725900-02	41.61	62.52	40.31	331.57	309.45	352.79	-	-	-
	Os02t0803300-01	18.97	62.42	49.81	7.01	8.72	32.14	-	-	-
	Os09t0499000-01	29.99	62.41	93.36	21.07	14.74	51.79	-	-	-
	Os04t0111225-00	7.92	62.35	69.14	20.85	32.19	180.96	-	-	-
	Os06t0608800-02	30.94	62.34	127.87	55.86	49.71	236.56	-	-	-
	Os01t0254100-02	41.6	62.34	59.25	25.68	56.83	60.36	-	-	-
	Os03t0142800-01	42.96	62.29	44.36	9.16	18.88	30.98	-	-	-
	Os04t0447650-00	10.64	62.28	61.66	4.82	4.21	119.47	-	-	-
	Os04t0530500-02	48.59	62.26	23.93	26.32	20.69	13.63	-	-	-
	Os01t0254100-01	49.6	62.26	67.38	36.86	61.02	57.81	-	-	-
	Os10t0531300-01	15.81	62.24	42.44	26.25	33.89	187.84	-	-	-
	Os07t0208566-00	34.72	62.22	11.42	7.2	43.6	1.89	-	-	-
	Os02t0532300-02	23.69	62.21	76.35	3.76	6.19	26.58	-	-	-
	Os01t0135700-01	8.76	62.13	221.31	123.78	40.46	16.81	-	-	-
	Os08t0292900-01	43.2	62.01	56.47	107.04	114.35	114.08	-	-	-
	Os01t0595400-01	48.18	62	45.23	61.61	58.39	46.01	-	-	-
	Os04t0457800-01	35.65	61.83	40.13	45.87	60.62	95.53	-	-	-
	Os05t0524400-02	48.68	61.78	45.5	27.8	23.83	44.33	-	-	-
	Os04t0650900-01	42.45	61.75	8.25	4.51	8.03	2.66	-	-	-
	Os07t0418600-01	40.74	61.74	150.34	2.93	6.56	60.6	-	-	-
	Os03t0838400-01	8.06	61.69	12.31	1.37	1.71	31.17	-	-	-
	Os06t0590301-01	35.08	61.68	30.73	40.73	58.89	51.53	-	-	-
	Os02t0822450-00	47.55	61.64	54.44	38.56	44.08	49.04	-	-	-
	Os07t0416900-01	38.74	61.6	45.95	0.19	0.08	2.04	-	-	-
	Os01t0960400-03	33.91	61.6	98.28	29.86	31.5	31.3	-	-	-
	Os05t0549000-02	51.65	61.59	87.22	49.54	61.27	89.15	-	-	-
	Os12t0285100-02	38.17	61.54	26.96	62.49	151.36	45.87	-	-	-
	Os01t0180800-02	42.36	61.39	25.35	4.98	24.56	102.67	-	-	-
	Os12t0285100-03	38.6	61.28	27.15	63.71	152.14	45.77	-	-	-
	Os08t0107100-01	34.62	61.2	85.14	23.24	36.89	123.64	-	-	-
	Os12t0131400-01	20.36	61.19	15.9	1.38	2.35	8.9	-	-	-
	Os04t0671200-02	47.12	61.19	143.89	25.64	62.09	76.2	-	-	-
	Os01t0556400-01	48.05	61.12	49.6	45.03	50.81	52.1	-	-	-
	Os05t0116150-00	29.65	61.09	25.2	146.35	187.58	81.59	-	-	-
	Os04t0584600-03	23.63	61.08	41.31	12.02	42.2	149.58	-	-	-
	Os10t0580900-01	44.67	61.05	69.16	28.79	23.64	82.47	-	-	-
	Os03t0407000-01	40.69	61.02	25.08	42.55	76.69	62.55	-	-	-
	Os03t0707600-01	36.16	60.89	16.02	40.94	71.96	28.62	-	-	-
	Os10t0140200-01	23.11	60.88	21.31	22.49	49.73	62.36	-	-	-
	Os04t0542900-01	26.42	60.87	10.12	48.22	85.27	32.78	-	-	-
	Os08t0465800-01	32.11	60.85	31.64	42.93	97.95	22.67	-	-	-
	Os04t0458200-02	36.58	60.85	22.93	46.18	58.34	30.55	-	-	-
	Os01t0795000-01	19.66	60.75	2.41	2.87	11.38	2.44	-	-	-
	Os03t0767000-01	26.58	60.65	23.53	13.49	22.31	9.03	-	-	-
	Os07t0596600-03	47.58	60.62	60.42	36.92	52.6	45.22	-	-	-
	Os06t0666400-01	20.59	60.58	405.62	77.87	25.22	81.04	-	-	-
	Os03t0351100-01	36.86	60.56	91.18	83.67	65.88	122	-	-	-
	Os09t0334500-01	21.18	60.52	55.15	53.7	22.54	123.82	-	-	-
	Os04t0660000-01	14.34	60.49	81.52	0.13	0.15	0.06	-	-	-
	Os11t0195500-01	33.72	60.46	68.84	36.38	22.94	42.42	-	-	-
	Os07t0498150-00	43.64	60.45	17.13	16.23	25.87	10.93	-	-	-
	Os09t0426000-01	22.25	60.43	47.54	5.87	7.82	20.4	-	-	-
	Os08t0545200-02	28.46	60.41	70.89	390.91	272.93	207.29	-	-	-
	Os07t0694000-01	37.58	60.14	35.45	76.68	86.18	114.37	-	-	-
	Os06t0159600-01	37.18	60.13	55.44	3.41	4.74	14.6	-	-	-
	Os04t0567700-01	47.48	60.13	40.29	24.86	23.98	50.93	-	-	-
	Os05t0543700-02	45.79	60.1	63.66	77.68	81.95	124.31	-	-	-
	CUFF.35581.1	29.24	60.07	25.12	2.4	5.96	17.64	chr10	8826425	8827797
	Os09t0499201-00	28.02	60.05	83.55	19.94	14.05	35.46	-	-	-
	Os05t0429100-02	46.77	60.04	44.5	23.53	27.21	38.01	-	-	-
	Os10t0529500-01	15.31	60	204.92	1.54	1.67	55.93	-	-	-
	Os06t0126000-02	37.15	59.81	40.33	34.85	60.16	38.33	-	-	-
	Os03t0838400-02	8.76	59.79	11.48	1.49	1.75	27.2	-	-	-
	Os03t0137200-01	42.55	59.79	25.47	27.46	45.16	41.69	-	-	-
	Os09t0431300-00	4.94	59.73	16.03	0.06	0.08	0.16	-	-	-
	Os10t0536050-00	29.66	59.67	60.41	52.76	47.83	37.92	-	-	-
	Os02t0527900-00	10.42	59.67	38.73	1.67	4.5	11.12	-	-	-
	Os12t0586000-01	32.75	59.63	136.38	45.98	50.29	93.77	-	-	-
	Os07t0176200-02	37.59	59.59	42.28	25.43	29.8	28.83	-	-	-
	Os05t0439400-01	22.01	59.58	32.96	74.22	59.8	120.09	-	-	-
	Os06t0486800-01	39.02	59.57	46.79	73.16	92.16	96.4	-	-	-
	Os01t0290800-01	36.78	59.56	34.93	3.13	8.6	64.97	-	-	-
	CUFF.3687.4	32.77	59.53	97.2	8.91	11.08	33.32	chr01	28831634	28833259
	Os01t0298400-01	4.37	59.35	56.6	2.96	0.8	2.65	-	-	-
	Os03t0822700-01	34.95	59.32	149.6	25.56	28.35	111.5	-	-	-
	Os03t0187500-02	45.15	59.28	24.76	10.13	7.56	3.25	-	-	-
	Os02t0618200-01	39.79	59.23	32.77	83.33	80.98	9.52	-	-	-
	Os11t0472000-02	49.13	59.21	47.18	49.83	52.08	31	-	-	-
	Os01t0783500-01	37.83	59.21	112.47	29.88	40.4	76.87	-	-	-
	Os11t0622800-00	31.3	59.19	0.51	0.05	0.02	0	-	-	-
	Os06t0603600-02	24.44	59.19	21.95	19.37	15.33	26.66	-	-	-
	Os08t0366000-04	28.62	59.18	28.71	126.83	189.48	231.83	-	-	-
	Os11t0155600-01	41.02	59.16	46.11	9.34	10.45	65.68	-	-	-
	Os02t0562300-01	45.3	59.16	30.97	47.81	54.08	66.23	-	-	-
	Os04t0671200-01	40.82	59.12	130.85	21.17	55.1	83.67	-	-	-
	Os08t0189900-00	38.46	59.11	346.79	0.26	0.16	54.54	-	-	-
	Os07t0677200-01	22.01	59.09	27.46	11.97	59.05	1880.4	-	-	-
	Os03t0189400-01	28.86	59.09	22.65	22.53	15.99	56.6	-	-	-
	Os01t0952800-02	1.14	59.08	239.98	1.31	1.67	5.11	-	-	-
	Os11t0599200-01	29.35	59.01	28.06	62.52	95.95	54.19	-	-	-
	Os06t0700601-00	17.49	58.96	18.6	0.53	1.73	0.2	-	-	-
	Os01t0214800-02	19.61	58.96	46.94	18.37	38.53	49.7	-	-	-
	Os05t0410100-01	24.01	58.91	66.56	18.61	57.74	90.64	-	-	-
	Os12t0625102-00	22.75	58.9	55.92	73.39	89.96	156.75	-	-	-
	Os01t0261200-02	43.96	58.85	124.03	43.79	37.41	59.43	-	-	-
	Os06t0580100-02	39.24	58.83	50.72	44.23	71.75	81.16	-	-	-
	Os01t0311800-01	27.33	58.82	64.7	0.07	0.13	1.62	-	-	-
	Os02t0758000-01	24.78	58.79	439.79	5.63	23.75	600.6	-	-	-
	Os06t0115300-01	29.39	58.74	64.82	555.48	252.72	115.26	-	-	-
	Os04t0149400-01	13.81	58.69	48.77	16.99	11.9	446.63	-	-	-
	Os09t0522200-01	2.44	58.64	252.45	69.64	2.27	4.69	-	-	-
	Os05t0543700-01	44.69	58.64	62.17	75.56	79.94	120.98	-	-	-
	Os09t0380000-01	31.74	58.61	41.22	15.01	24.67	52.91	-	-	-
	Os08t0545300-01	27.13	58.59	69.46	388.25	259.17	197.78	-	-	-
	Os10t0509401-00	5.94	58.58	192.06	8.27	23.25	86.59	-	-	-
	Os05t0154600-01	41.03	58.57	70.99	59.52	74.7	97.06	-	-	-
	Os05t0432400-01	27.84	58.45	27.45	15.21	37.74	54.14	-	-	-
	Os01t0593200-01	32.81	58.45	55.95	13.24	24.04	8.71	-	-	-
	Os07t0446100-01	36.47	58.43	107.03	20.88	24.78	28.81	-	-	-
	Os08t0175200-01	50.56	58.41	71.02	31.74	33.84	32.86	-	-	-
	Os10t0452500-00	40.75	58.36	0.56	0.34	0	0.03	-	-	-
	Os09t0322000-01	19.06	58.36	56.01	16.7	17.6	77.12	-	-	-
	Os05t0429100-01	45.41	58.3	43.22	22.84	26.41	36.93	-	-	-
	Os07t0406300-01	41.43	58.28	11.02	10.1	18.47	26.32	-	-	-
	Os04t0614650-00	6.01	58.23	37.81	2.81	9.1	37.91	-	-	-
	Os03t0268400-01	46.14	58.21	26.69	8.39	14.83	20.83	-	-	-
	Os03t0680800-05	35.29	58.1	57.34	80.94	99.63	169.93	-	-	-
	Os01t0261200-01	36.33	57.99	108.69	33.46	35.18	77.11	-	-	-
	Os05t0524400-01	44.93	57.97	42.71	25.5	22.12	41.32	-	-	-
	Os03t0129100-01	12.01	57.91	103.63	28.59	26.87	102.62	-	-	-
	Os01t0292250-00	6.93	57.87	21.37	25.44	31.14	126	-	-	-
	Os03t0310400-01	41.09	57.85	54.37	50.16	56.05	91.56	-	-	-
	Os02t0710500-01	22.33	57.85	43.83	4.82	11.64	25.74	-	-	-
	Os02t0700600-02	37.38	57.75	7.99	9.95	31.53	12.09	-	-	-
	Os08t0416000-02	18.09	57.74	26.67	11.94	40.77	53.5	-	-	-
	Os07t0606600-01	6.98	57.74	6.91	11.41	22.63	3.74	-	-	-
	Os05t0585601-00	13.24	57.73	40.52	4.62	15.19	24.06	-	-	-
	Os08t0260600-01	30.1	57.71	27.61	1.55	5.36	9.2	-	-	-
	Os02t0712700-01	19.41	57.69	44.51	2.04	2.54	30.66	-	-	-
	Os02t0266800-01	43.5	57.69	40.89	21.36	21.06	50.92	-	-	-
	Os09t0380000-02	36.86	57.67	48.35	18.26	24.83	49.66	-	-	-
	Os06t0708050-00	6.24	57.53	75.31	3.35	30.91	30.72	-	-	-
	CUFF.34260.1	17.25	57.49	34.74	25.11	76.04	78.38	chr09	19196681	19196960
	Os07t0545800-01	18.11	57.46	75.57	60.17	23.29	35.93	-	-	-
	Os07t0684800-02	16.18	57.42	65.83	14.18	15.64	132.06	-	-	-
	Os12t0570000-01	38.69	57.39	70.8	32.06	47.56	67.65	-	-	-
	Os06t0521500-01	13.69	57.36	25.37	0.17	0.86	2.73	-	-	-
	Os05t0542150-01	16.38	57.36	17.3	8.05	6.9	14.5	-	-	-
	Os05t0475475-00	43.84	57.35	19.75	2.53	4.39	26.75	-	-	-
	Os03t0244950-00	13.03	57.29	50.57	17.44	53.99	223.43	-	-	-
	Os07t0154100-01	0.58	57.27	147.57	0.68	0.64	4.34	-	-	-
	Os03t0838450-00	5.8	57.21	11.5	1.03	1.42	28.99	-	-	-
	Os10t0113000-01	41.42	57.19	146.86	16.69	6.49	51.79	-	-	-
	Os05t0549000-01	48.91	57.13	82.03	46.48	56.98	83.67	-	-	-
	Os02t0624300-01	9.02	57.11	63.94	0.78	1.29	26.41	-	-	-
	Os03t0750500-01	24.2	57.09	95.45	12.85	21.72	33.65	-	-	-
	Os03t0276900-00	36.51	56.85	27.57	13.38	13.51	8.33	-	-	-
	Os03t0597600-01	41.29	56.79	14.31	4.84	5.02	3.28	-	-	-
	Os06t0664300-01	43.52	56.78	52.74	44.51	66.14	109.41	-	-	-
	Os04t0435700-01	37.52	56.76	34.92	113.54	151.51	127.15	-	-	-
	Os03t0122300-02	6.52	56.67	15.77	1.07	10.36	58.34	-	-	-
	Os07t0501900-01	39.59	56.61	47.39	21.75	33.68	70.3	-	-	-
	Os03t0191400-00	19.85	56.59	83.29	9.14	14.37	44.92	-	-	-
	Os03t0822700-02	31.4	56.58	141.04	24	26.74	103.86	-	-	-
	Os07t0516400-00	11.1	56.56	206.67	0.46	0.41	6.72	-	-	-
	Os01t0121300-01	49.84	56.52	45.61	14.24	32.1	8.78	-	-	-
	Os06t0717900-01	14.11	56.48	68.51	13.18	10.2	32.2	-	-	-
	Os04t0539800-01	32.78	56.41	59.48	34.98	42.85	67.33	-	-	-
	Os08t0300300-01	22.27	56.34	5.21	36.68	33.15	21.86	-	-	-
	Os03t0856000-01	33.09	56.28	31.98	12.24	21.64	23.83	-	-	-
	Os02t0528900-01	20.8	56.24	9.78	0.75	1.36	6	-	-	-
	Os08t0517001-00	27.81	56.2	115.3	24.3	15.54	60.84	-	-	-
	Os01t0837350-00	37.06	56.2	33.08	21.47	44.44	30.26	-	-	-
	Os11t0227000-01	34.72	56.18	135.09	62.08	55.72	42.69	-	-	-
	Os02t0790500-03	19.71	56.18	136.35	36.17	9.65	47.26	-	-	-
	Os02t0605900-01	21.81	56.12	104.85	6.95	13.34	26.82	-	-	-
	Os04t0474800-01	17.77	56.08	14.69	5.83	25.52	71.14	-	-	-
	Os08t0137900-01	18.26	56.07	431.97	0.34	0.28	10.63	-	-	-
	Os06t0126000-01	35.21	56.05	38.08	34.25	57.18	35.88	-	-	-
	Os03t0691800-01	44.58	56.05	37.05	3.99	4.64	5.12	-	-	-
	Os08t0531000-02	42.49	56.04	16.79	34.19	37.83	4.3	-	-	-
	Os01t0185200-01	21.26	56.03	34.93	12.45	35	46.48	-	-	-
	Os05t0506200-01	35.68	56.01	15.02	10.54	22.42	93.28	-	-	-
	Os09t0544300-01	37.56	55.98	87.08	27.3	29.4	42.09	-	-	-
	Os01t0663800-02	44.41	55.94	28.52	47.23	58.75	67.44	-	-	-
	Os01t0121600-01	7.11	55.94	96.07	8.66	4.84	8.08	-	-	-
	Os08t0545000-01	7.41	55.85	34.04	18.4	25.48	32.1	-	-	-
	Os02t0806900-01	46.55	55.8	31.06	7.71	10.31	18.1	-	-	-
	Os07t0678300-01	27.1	55.77	29.91	21.21	30.61	47.58	-	-	-
	Os05t0358500-02	24.01	55.74	30.98	7.88	14.44	30.2	-	-	-
	Os03t0680800-03	37.4	55.73	55.71	84.27	98.79	133.99	-	-	-
	Os06t0114066-00	41.95	55.72	8.98	51.56	112.11	114.09	-	-	-
	Os06t0103100-01	37.03	55.7	51.17	1.78	2.46	30.89	-	-	-
	Os01t0627701-01	11.94	55.7	29.14	0.26	0.09	1.32	-	-	-
	Os01t0867300-01	17.41	55.68	25.63	35.91	39.77	55.02	-	-	-
	Os12t0566050-00	33.52	55.67	47.79	0.92	2.66	0.06	-	-	-
	Os03t0267200-01	16.41	55.67	370.51	12.55	11.53	70.65	-	-	-
	Os05t0524100-01	11.04	55.58	38.79	56.77	8.16	13.74	-	-	-
	Os08t0205800-01	11.93	55.57	500.89	35.67	11.7	157	-	-	-
	Os07t0684800-01	15.34	55.45	62.58	13.04	15.01	124.34	-	-	-
	Os06t0726300-00	10.77	55.39	27.81	13.36	19.71	38.77	-	-	-
	Os03t0116333-00	25.03	55.39	52.41	32.73	68.17	52.44	-	-	-
	Os07t0675000-02	44.57	55.38	44.49	35.1	39.04	91.01	-	-	-
	Os01t0936100-02	26.47	55.37	34.32	21.33	21.26	29.59	-	-	-
	Os01t0767900-01	24.46	55.36	40.62	44.42	52.21	46.9	-	-	-
	Os09t0467400-02	26.88	55.23	12.1	36.4	21.31	32.89	-	-	-
	Os05t0105000-01	41.56	55.23	35.52	29.69	41.53	117.1	-	-	-
	Os06t0712200-01	34.23	55.22	55.41	21.41	53.37	12.33	-	-	-
	Os02t0332800-02	13.1	55.14	9.23	2.19	3.56	14.92	-	-	-
	Os09t0456850-00	21.89	55.13	44.08	7.88	14.51	30.49	-	-	-
	Os02t0488600-01	29.02	55.12	45.24	32.02	44.29	44.55	-	-	-
	Os03t0281000-01	35.38	55.11	39.23	65.86	65.41	85.03	-	-	-
	Os09t0453000-02	38.09	55.1	26.65	38.97	42.48	43.04	-	-	-
	Os09t0468300-00	11.04	55.05	102.22	1.95	2.17	21.55	-	-	-
	Os01t0860450-01	21.33	55.01	26.51	10.87	15.84	52.07	-	-	-
	Os09t0502500-01	15.99	55	22.99	1.42	1.38	18.39	-	-	-
	Os09t0432900-01	18.22	54.98	138.81	10.91	13.24	4.18	-	-	-
	Os01t0953600-02	47.5	54.94	54.97	17.73	20.97	11.62	-	-	-
	Os08t0538300-02	40.63	54.89	83.06	31.99	36.66	40.44	-	-	-
	Os03t0802650-00	28.44	54.8	94.6	7.06	8.09	5.35	-	-	-
	Os03t0559700-00	39.49	54.76	50.53	21.03	41.93	11.5	-	-	-
	Os02t0654700-01	29.79	54.72	112.42	16.76	5.17	27.63	-	-	-
	Os12t0617250-00	1.59	54.71	20.33	0.82	5.5	1.92	-	-	-
	Os01t0967800-01	46.7	54.66	32.3	65.91	76.81	82.16	-	-	-
	Os02t0180700-01	38.1	54.62	105.24	20.31	42.81	59.27	-	-	-
	Os05t0179800-01	23.66	54.57	99.42	24.39	26.5	154.7	-	-	-
	Os04t0444200-01	44.95	54.57	49.45	31.33	36.56	82.1	-	-	-
	Os08t0107100-02	46.15	54.5	94.95	29.12	34.09	62.73	-	-	-
	Os09t0478733-00	20.74	54.45	28.97	7.42	20.65	3.29	-	-	-
	Os03t0123800-01	18.64	54.41	63.02	9.94	9.75	19.73	-	-	-
	Os06t0714200-01	20.71	54.36	48.55	19.94	27.45	43.23	-	-	-
	Os09t0327400-01	40.69	54.22	7.86	148.36	99.72	23.55	-	-	-
	Os03t0786000-01	33.6	54.2	50.92	30.67	34.3	39.01	-	-	-
	Os02t0174250-00	39.8	54.12	60.06	59.88	85.98	71.02	-	-	-
	Os04t0458200-01	30.21	54.07	19.23	35.47	49.34	26.6	-	-	-
	Os02t0649800-01	40.02	53.99	25.37	16.52	22.43	65.45	-	-	-
	Os06t0521500-02	13.67	53.97	24.55	0.17	0.84	2.69	-	-	-
	Os10t0502600-02	43.18	53.91	51.53	58.1	48.75	41.75	-	-	-
	Os08t0548650-00	11.4	53.87	17.73	4.36	10.81	12.86	-	-	-
	Os06t0690400-00	20.97	53.73	70.55	7.95	8.23	24.89	-	-	-
	Os08t0434100-01	8.64	53.66	33.9	21.24	91.06	87.19	-	-	-
	Os06t0625900-01	21.75	53.65	20.94	24.05	25.24	10.31	-	-	-
	Os04t0458250-00	29.99	53.6	19.1	35.36	48.97	26.38	-	-	-
	Os08t0398000-01	13.88	53.58	53.89	5.22	6.01	25.44	-	-	-
	Os02t0621800-01	24.53	53.58	6.65	2.27	3.35	3.96	-	-	-
	Os02t0608500-02	40.36	53.51	32.04	15.83	23.09	21.61	-	-	-
	Os11t0634200-01	32.03	53.47	57.44	38.53	64.75	264.74	-	-	-
	Os06t0229200-01	25.58	53.43	39.76	9.68	13.8	36.41	-	-	-
	Os02t0601100-01	41.28	53.42	66.93	38.23	34.63	59.87	-	-	-
	Os07t0685700-01	19.62	53.4	55.58	47.29	59.19	272.93	-	-	-
	Os07t0257400-00	26.6	53.36	8.81	0.72	1.43	0.02	-	-	-
	Os06t0711100-01	29.86	53.36	79.67	30.16	43.39	191.95	-	-	-
	Os06t0697600-01	20.63	53.35	97.06	3.38	4.66	75.7	-	-	-
	Os12t0471100-01	10.74	53.33	5.54	1.12	1.25	13.62	-	-	-
	Os04t0526800-01	22.08	53.31	20.75	5	4.6	14.31	-	-	-
	Os02t0540700-00	2.92	53.22	64.05	14.06	10.68	28.18	-	-	-
	Os03t0241300-04	44.41	53.21	33.11	84.86	46.22	35.33	-	-	-
	Os05t0560300-01	33.86	53.18	69.38	8.97	9.96	58.48	-	-	-
	Os05t0179800-02	36.05	53.17	141.11	38.06	28.28	128.21	-	-	-
	Os06t0716050-00	24.18	53.14	68.72	46.65	27.83	54.23	-	-	-
	Os01t0793900-01	10.61	53.09	53.09	41.95	27.11	29.01	-	-	-
	Os03t0820400-01	4.5	53.08	785.15	5.75	1.81	19.41	-	-	-
	Os02t0196600-01	38.87	52.95	61.6	8.47	10.22	20.64	-	-	-
	Os03t0111400-01	32.1	52.93	60.26	13.39	28.42	62.87	-	-	-
	Os01t0348600-01	34.63	52.92	47.25	38.3	45.86	131.71	-	-	-
	Os09t0478600-01	35.61	52.9	41.73	12.37	23.88	2.82	-	-	-
	Os01t0880200-02	28.17	52.9	58.74	15.78	29.09	12.27	-	-	-
	Os01t0136400-01	18.8	52.87	31.08	12.47	12.76	19	-	-	-
	Os07t0516300-01	29.25	52.85	168.9	17.31	25.36	31.32	-	-	-
	Os03t0241300-02	25.04	52.83	28.48	23.83	25.9	29.18	-	-	-
	Os12t0147800-01	40.86	52.82	107.71	41.39	94.88	244.09	-	-	-
	Os09t0450300-02	43.35	52.82	11.42	20.19	31.73	8.47	-	-	-
	Os02t0774200-01	12.95	52.8	272.95	6.24	4.77	12.11	-	-	-
	Os06t0608800-03	25.46	52.78	109.74	45.96	42.58	203.13	-	-	-
	Os12t0263800-03	40.64	52.75	42.96	29.7	42.01	19.77	-	-	-
	Os02t0717600-01	28.9	52.72	20.97	21.59	26.25	45.68	-	-	-
	Os05t0223000-01	36.18	52.7	71.7	106.4	103.48	83.59	-	-	-
	Os02t0661100-02	28.32	52.7	83.02	63.33	56.59	1.97	-	-	-
	Os04t0565900-01	40.79	52.62	13.98	1.96	1.88	0.61	-	-	-
	Os09t0516600-02	44.02	52.6	47.12	79.28	102.75	123.3	-	-	-
	Os07t0190000-01	30.09	52.55	4.18	3.22	4.05	26.33	-	-	-
	Os06t0717900-02	9.32	52.54	51.19	8.77	8.79	25.05	-	-	-
	Os07t0596600-02	38.23	52.5	56.91	29.91	43.63	36.15	-	-	-
	Os10t0341700-03	42.58	52.4	24.72	20.34	27.84	83.69	-	-	-
	Os10t0395000-01	17.15	52.37	52.88	17.7	9.49	41.76	-	-	-
	Os10t0394000-01	19.29	52.37	67.84	0.59	0.88	3.14	-	-	-
	Os03t0680800-02	25.58	52.37	45.88	62	88.84	159.07	-	-	-
	Os07t0568300-02	22.71	52.35	47.92	15.56	28.4	49.54	-	-	-
	Os01t0304400-00	3	52.27	263.09	2.51	0.8	1.19	-	-	-
	Os11t0543100-01	11.62	52.24	71.23	12.51	14.66	53.34	-	-	-
	Os08t0409100-01	33.88	52.24	19.25	66.52	144.47	4.32	-	-	-
	Os05t0119200-01	22.69	52.24	205	22.75	15.39	36.16	-	-	-
	Os09t0450300-03	43.71	52.22	11.11	20.07	31.1	8.55	-	-	-
	Os03t0760200-01	33.15	52.19	309.93	62.17	36.68	494.86	-	-	-
	Os01t0719600-01	20.97	52.16	5.01	25.29	23.63	0.07	-	-	-
	Os07t0406350-00	41.84	52.13	14.5	16.19	18.97	20.07	-	-	-
	Os08t0530000-01	45.47	52.06	39.23	39.23	49.71	93.61	-	-	-
	Os05t0159250-00	14.87	52.06	44.98	4.86	20.41	60.75	-	-	-
	Os01t0864500-01	15.23	52.06	182.22	33.46	7.51	48.51	-	-	-
	Os12t0145150-00	33.45	52.05	94.32	104.82	56.28	62.15	-	-	-
	Os09t0572400-01	20.09	52.05	30.84	20.21	23.6	63.54	-	-	-
	Os02t0473200-01	40.96	51.97	49.46	10.8	10.27	22.33	-	-	-
	Os04t0691100-01	32.5	51.94	28.43	44.18	47.82	61.23	-	-	-
	Os02t0790500-01	17.7	51.89	145.64	31.96	8.68	70.91	-	-	-
	Os06t0149900-01	21.55	51.88	94.41	51.29	46.75	74.56	-	-	-
	Os04t0179200-01	40.8	51.88	37.34	0.32	0.23	30.99	-	-	-
	Os03t0289100-01	16.21	51.85	17.2	2.14	9.93	50.17	-	-	-
	Os03t0680800-01	31.44	51.76	51.12	72.14	88.88	152.76	-	-	-
	Os03t0406001-00	25.99	51.76	101.65	4.14	10.26	46	-	-	-
	Os01t0708500-02	35.24	51.76	31.31	10.63	11.88	15.5	-	-	-
	Os02t0201300-01	9.66	51.66	53.65	6.3	7.81	15.88	-	-	-
	Os08t0564800-01	34.1	51.63	38.46	21.7	29.94	59.91	-	-	-
	Os06t0193400-02	27.39	51.61	66.2	54.08	38.16	41.86	-	-	-
	Os10t0495300-01	38.12	51.59	37	27.1	32.37	70.24	-	-	-
	Os03t0741100-01	18.23	51.55	138.14	68.89	48.66	46.86	-	-	-
	Os06t0147000-01	9.62	51.54	23.95	6.1	12.09	5.77	-	-	-
	Os03t0731500-02	43.8	51.54	42.38	24.87	33.13	49.77	-	-	-
	Os03t0743500-01	22.39	51.51	94.42	7.37	8.81	49.89	-	-	-
	Os12t0263800-01	30.82	51.49	39.33	16.93	38.37	15.77	-	-	-
	Os01t0754800-01	22.31	51.48	23.02	0.03	0.06	0	-	-	-
	Os08t0112500-01	26.34	51.45	68.17	9.11	14.12	37.26	-	-	-
	Os01t0923750-00	14.35	51.43	30.89	3.17	10.61	70.24	-	-	-
	Os06t0268750-00	36.3	51.42	55.63	23.88	56.53	23.86	-	-	-
	Os04t0586100-01	37.43	51.4	21.18	20.35	58.92	6.92	-	-	-
	Os03t0691900-00	38.42	51.39	31.89	4.72	3.48	3.61	-	-	-
	Os08t0434150-00	5.06	51.38	25.93	14.56	86.34	84.73	-	-	-
	Os12t0582700-01	31.46	51.34	56.66	0.31	0.64	0.18	-	-	-
	Os01t0837300-01	25.97	51.32	25.6	14.02	40.19	24.85	-	-	-
	Os10t0101200-01	32.58	51.3	78.43	126.4	96.04	156.23	-	-	-
	Os01t0858900-01	31.4	51.23	35.54	6.94	14.75	31.1	-	-	-
	Os10t0407000-01	32.23	51.17	46.03	88.75	63.54	44.93	-	-	-
	Os03t0802600-01	31.5	51.15	96.44	8.41	8.17	6.04	-	-	-
	Os11t0516000-01	34.19	51.13	107.46	28	29.89	82.34	-	-	-
	Os05t0159200-01	30.27	51.11	73.2	11.86	23.68	47	-	-	-
	Os12t0607000-02	42.36	51.08	67.33	72.24	95.58	21.86	-	-	-
	Os12t0632800-00	13.71	51.07	34.57	5.98	21.03	37.67	-	-	-
	Os10t0518300-01	37.84	51.07	55	29.09	29.39	77.03	-	-	-
	Os06t0656500-01	31.49	51.07	43.25	47.5	63.03	58.67	-	-	-
	Os09t0453900-02	30.96	51.04	35.78	7.09	11.65	9.71	-	-	-
	Os12t0260500-01	27.25	51.03	37.07	0.09	0.04	0.28	-	-	-
	Os03t0731500-01	43.35	51.01	41.95	24.67	32.9	49.24	-	-	-
	Os06t0716000-02	24.96	50.99	67.68	46.48	24.99	66.2	-	-	-
	Os02t0541150-00	26.56	50.97	87.28	14.9	29.86	30.87	-	-	-
	Os04t0460600-02	13.54	50.94	12.57	14.18	19.92	3.65	-	-	-
	Os12t0131300-01	16.84	50.86	11.49	2.06	3.21	8.33	-	-	-
	Os03t0323600-01	24.48	50.86	31.9	26.93	45.67	44.03	-	-	-
	Os01t0332100-02	15.66	50.83	108.07	231.53	65.52	131.56	-	-	-
	Os07t0568300-01	22.32	50.82	46.76	15.36	27.49	48.11	-	-	-
	Os01t0957000-02	39.25	50.82	39.17	22.42	27.1	35.68	-	-	-
	Os09t0251800-01	17.14	50.81	55.39	58.87	52.23	36.93	-	-	-
	Os09t0520200-00	27.05	50.79	95.96	30.37	36.72	46.93	-	-	-
	Os01t0766300-00	3.49	50.79	101.36	0.8	1.18	5.54	-	-	-
	Os01t0120800-02	39.44	50.77	8.88	2.13	14.38	32.35	-	-	-
	Os05t0206100-00	15.06	50.71	59.67	0.07	0.09	0.46	-	-	-
	Os09t0450300-01	42.08	50.66	10.96	19.4	30.6	8.25	-	-	-
	Os08t0562750-00	35.74	50.62	30.67	80.35	106.64	109.7	-	-	-
	Os07t0585900-00	9.32	50.61	217.89	2.01	0.79	19.14	-	-	-
	Os01t0508100-01	6.12	50.57	66.81	5.78	5.75	15.7	-	-	-
	Os04t0270100-02	30.03	50.56	7.18	5.75	24.11	42.39	-	-	-
	Os05t0595200-01	4.46	50.5	93.68	8.44	8.96	38.39	-	-	-
	Os10t0554200-01	18.28	50.49	4.34	11.02	40.5	5.38	-	-	-
	Os06t0587100-00	3.27	50.49	5.9	0	0	0.95	-	-	-
	Os06t0239100-01	7.65	50.49	190.81	1.29	0.45	5.68	-	-	-
	Os01t0192300-01	23.17	50.47	81.99	19.83	8.04	68.49	-	-	-
	Os02t0525100-01	22.43	50.45	27.65	8.23	9.23	44.5	-	-	-
	Os06t0159900-01	13.35	50.34	41.41	4.14	4.86	109.2	-	-	-
	Os02t0579800-01	15.06	50.34	28.04	70.07	80.58	82.87	-	-	-
	Os03t0719300-01	40.77	50.33	33.84	16.06	19.19	59.11	-	-	-
	Os07t0176200-01	26.22	50.22	30.13	15.79	21.94	25.87	-	-	-
	Os08t0357000-02	42.78	50.16	63.95	568.79	193.71	132.31	-	-	-
	Os06t0172800-00	18.34	50.1	49.44	7.26	11.92	41.49	-	-	-
	Os08t0398400-01	29.79	50.05	32.87	59.11	39.45	64.35	-	-	-
	Os06t0606700-00	40.42	50.05	15.92	168.06	251.4	7.54	-	-	-
	Os06t0568600-01	15.7	50.03	0.22	0.01	0.05	1.04	-	-	-
	Os03t0437200-01	18.56	50.01	103.88	1.59	0.7	29.68	-	-	-
	Os03t0734000-01	32.99	50	11.1	0.46	0	0.16	-	-	-
	Os08t0538300-01	35.35	49.98	76.6	27.99	32.47	36.42	-	-	-
	Os02t0602100-02	20.7	49.86	38.89	15.97	38.24	44.58	-	-	-
	Os06t0554600-00	43.49	49.81	52.68	6.88	12.64	5.63	-	-	-
	Os09t0392000-01	37.04	49.66	45.07	34.2	29.78	36.23	-	-	-
	Os04t0583900-01	4.86	49.58	8.5	9.01	13.24	12.94	-	-	-
	Os01t0679600-01	38.22	49.56	25.5	15.32	15.45	8.65	-	-	-
	Os05t0511400-01	37.4	49.55	54.2	21.63	31.71	63.14	-	-	-
	Os01t0805800-02	41.95	49.53	29.74	31.28	34.88	23.64	-	-	-
	Os05t0134200-01	28.59	49.49	94.04	30.85	42.83	38.88	-	-	-
	Os03t0692700-05	24.79	49.47	59.74	16.57	20.64	57.43	-	-	-
	Os10t0554200-02	11.8	49.45	3.33	10.01	42.36	5.17	-	-	-
	Os12t0514450-00	29.43	49.42	59.53	16.44	24.23	55.4	-	-	-
	Os09t0516600-01	41.19	49.42	44.07	74.04	96.87	114.44	-	-	-
	Os04t0119500-01	15.75	49.41	48.28	13.85	39.48	60.76	-	-	-
	Os12t0639200-01	30.25	49.39	68.75	0.26	0.53	0.31	-	-	-
	Os03t0258200-01	15.54	49.37	147.11	10.24	5.51	27.99	-	-	-
	CUFF.25148.1	16.61	49.37	10.78	5.6	8.44	248.5	chr06	23013066	23014993
	Os11t0207200-01	30.89	49.36	176.98	36.35	37.27	84	-	-	-
	Os01t0327100-02	26.41	49.36	155.84	5.79	32.92	14.84	-	-	-
	Os01t0805800-01	40.31	49.31	28.97	29.97	34.34	23.42	-	-	-
	Os09t0297000-01	34.77	49.28	48.44	14.7	20.09	30.3	-	-	-
	Os05t0137300-01	25.07	49.24	37.08	111.39	136.84	235.5	-	-	-
	Os02t0680600-01	34.8	49.21	32.94	69.54	53.71	56.54	-	-	-
	Os09t0472150-00	19.69	49.2	21.66	0.97	2.49	20.03	-	-	-
	Os03t0214200-02	15.53	49.19	12.41	4.7	12.91	9.12	-	-	-
	Os01t0802100-01	39.31	49.14	21.94	15.93	20.42	57.5	-	-	-
	Os07t0566200-02	33.08	49.13	52.28	11.6	21.7	46.1	-	-	-
	Os07t0566200-01	36.74	49.12	55.51	13.9	22.07	42.01	-	-	-
	Os10t0494000-01	14.19	49.1	23.54	7.9	10.15	36.43	-	-	-
	Os06t0154550-00	12.22	49.06	30.95	5.33	22.28	50.8	-	-	-
	Os02t0515200-01	11.89	49.06	71.39	11.65	9.52	32.15	-	-	-
	Os01t0842200-02	29.86	49.06	51.94	38.7	57.71	109.92	-	-	-
	Os04t0679800-02	28.47	49.04	27.7	16.15	16.74	22.15	-	-	-
	Os02t0527200-01	12.34	49.04	27.82	59.27	31.96	58.31	-	-	-
	Os07t0538200-02	36.88	48.97	31.41	1.73	4.55	27.01	-	-	-
	Os02t0601800-04	26.5	48.84	37.23	15.55	25.96	45.02	-	-	-
	Os03t0297000-02	25.17	48.8	78.5	41.41	32.43	52.29	-	-	-
	Os11t0536000-01	23.46	48.78	188.54	3.76	5.97	14.71	-	-	-
	Os07t0129300-00	7.9	48.76	18.7	2.04	1.65	1007.15	-	-	-
	Os03t0805400-02	23.22	48.75	88.73	8.24	9.06	51.04	-	-	-
	Os03t0837100-01	40.01	48.74	27.16	9.62	24.09	3.49	-	-	-
	Os03t0170400-02	27.94	48.72	58.82	33.54	40.73	25.76	-	-	-
	Os06t0558766-00	29.54	48.71	48.7	13.64	32.54	51.84	-	-	-
	Os03t0267000-00	0.75	48.71	330.93	1.03	1.41	168.06	-	-	-
	Os11t0523800-01	30.57	48.64	36.58	43.68	57.59	61.45	-	-	-
	Os04t0585700-01	16.46	48.58	14.97	88.84	190.81	5.06	-	-	-
	Os01t0716500-01	18.39	48.53	107.59	25.83	24.56	70.25	-	-	-
	Os04t0553800-02	43	48.51	42.47	16.99	17.72	13.23	-	-	-
	Os01t0948200-00	15.62	48.51	38.91	9.01	11.44	19.47	-	-	-
	Os03t0598900-01	34.27	48.47	48.89	41.1	42.06	34.04	-	-	-
	Os06t0506600-01	21.82	48.46	178.03	27.46	31.29	188.56	-	-	-
	Os12t0514400-01	37.36	48.45	62.48	20.69	24.09	52.02	-	-	-
	Os01t0672400-02	32.14	48.4	46.63	38.08	30.77	46.64	-	-	-
	Os04t0619450-00	22.64	48.38	196.34	45.97	26.24	71.19	-	-	-
	Os04t0559200-01	25.1	48.38	19.51	6.05	15.97	6.71	-	-	-
	Os11t0668600-00	13.34	48.31	12.44	0.18	0.43	7.97	-	-	-
	Os09t0322100-01	11.8	48.29	40	10.81	13.37	54.32	-	-	-
	Os02t0601800-02	20.01	48.29	39.59	13.61	22.85	41.23	-	-	-
	Os05t0464200-00	4.98	48.25	33.31	3	9.62	5.23	-	-	-
	Os12t0291066-00	22.82	48.24	65.44	5674.23	8354.13	324.91	-	-	-
	Os02t0548700-00	35.58	48.19	34.79	6.45	2.93	6.78	-	-	-
	Os10t0345100-01	17.67	48.18	83.54	8.45	18.29	62.2	-	-	-
	Os03t0289100-02	28.67	48.16	25.07	6.52	9.62	26.11	-	-	-
	Os06t0557200-01	27.39	48.13	37.93	11.57	23.44	54.53	-	-	-
	Os02t0590800-00	36.28	48.11	54.15	43.76	134.71	80.66	-	-	-
	Os04t0111250-01	2.92	48.08	52.94	6.81	14.76	103.09	-	-	-
	Os02t0603900-00	30.48	48.05	23.62	31.6	35.03	173.89	-	-	-
	Os06t0708075-00	10.7	48.03	29.66	6.81	26.61	19.96	-	-	-
	Os09t0474000-01	14.37	48.01	24.06	0.12	0.54	0.75	-	-	-
	Os07t0573800-03	41.54	48.01	37.53	212.01	175.82	81.79	-	-	-
	Os04t0502900-01	26.01	48	51.67	43.11	44.32	47.5	-	-	-
	Os03t0241600-01	30.35	47.97	18.68	9.5	26.88	27.95	-	-	-
	Os07t0150100-01	33.99	47.94	33.74	54.86	104.76	24.69	-	-	-
	Os08t0192800-01	36.93	47.91	25.86	53.69	55.84	38.85	-	-	-
	Os04t0460600-01	12.53	47.9	11.54	12.75	17.99	3.21	-	-	-
	Os03t0575200-01	18.37	47.83	15.26	7.56	15.61	76.19	-	-	-
	Os09t0453900-01	24.69	47.78	30.88	5.61	10.55	10.85	-	-	-
	Os01t0708500-01	34.13	47.76	28.92	9.99	10.74	13.81	-	-	-
	Os01t0893400-01	7.13	47.66	9.44	33.16	31.93	3.05	-	-	-
	Os04t0433600-02	36.89	47.64	83.29	35.18	50.26	26.67	-	-	-
	Os12t0635400-01	20.29	47.62	117.14	10.3	6.34	97.31	-	-	-
	Os04t0583200-01	6.37	47.6	55.55	8.74	2.31	105.74	-	-	-
	Os01t0859500-01	30.77	47.59	19.12	5.58	6.17	2.8	-	-	-
	Os01t0842200-01	28	47.59	50.11	38.76	55.2	107.15	-	-	-
	Os01t0631800-01	5.19	47.59	205.98	2.57	0.89	15.33	-	-	-
	Os02t0562600-01	27.94	47.57	28.49	0.46	1.4	8.32	-	-	-
	Os10t0341700-02	30.21	47.55	17.85	14.69	26.07	88.27	-	-	-
	Os09t0315700-01	12.75	47.54	18.31	9.25	13.58	8.73	-	-	-
	Os02t0661100-01	23.93	47.48	70.76	51.1	48.94	1.71	-	-	-
	Os07t0633200-01	28.19	47.42	40.02	18.88	19.9	68.65	-	-	-
	Os03t0791050-00	8.78	47.41	15.64	4.34	15.22	31.98	-	-	-
	Os03t0843100-01	31.62	47.4	69.56	36.03	36.34	82.86	-	-	-
	Os09t0513200-00	23.33	47.39	3.01	13.36	6.41	0.45	-	-	-
	Os11t0153300-02	20.34	47.37	96.73	23.44	28.31	36.11	-	-	-
	Os07t0672500-02	35.95	47.36	45.99	33.49	42.47	86.52	-	-	-
	Os01t0818650-00	24.13	47.34	41.63	8.92	14.51	10.83	-	-	-
	Os01t0699600-01	11.13	47.34	143.02	22.71	2.87	18.3	-	-	-
	Os01t0332100-01	11.51	47.31	81.17	140.88	54.46	164.23	-	-	-
	Os04t0398400-01	27.49	47.29	18.22	5.4	12.33	31.54	-	-	-
	Os09t0293450-00	24.95	47.28	34.55	12.91	14.93	23.27	-	-	-
	Os02t0529800-00	5.64	47.19	0.24	0.02	0	0.03	-	-	-
	Os03t0805400-03	29.9	47.18	110.7	10.89	9.06	46.69	-	-	-
	Os03t0195450-00	23.76	47.17	22.55	96.31	34.74	12.31	-	-	-
	Os02t0608500-01	32.92	47.13	28.09	12.89	20.71	18.57	-	-	-
	Os02t0689500-01	24.68	47.11	100.4	33.67	34.68	47.45	-	-	-
	Os05t0358500-01	16.17	47.05	23.53	5.08	11.2	26.87	-	-	-
	Os03t0843100-02	32.59	47.05	70.98	37.05	36.34	78.63	-	-	-
	Os12t0586600-01	33.61	47.01	18.94	26.53	33.29	37.21	-	-	-
	Os10t0147200-01	33.03	47	146.73	1.06	0.61	41.33	-	-	-
	Os01t0717700-01	26.99	46.99	6.52	83.8	70.61	13.15	-	-	-
	Os06t0725150-00	9.44	46.97	77.31	0	0.1	0.04	-	-	-
	Os06t0651100-02	28.1	46.96	9.68	16.37	16.56	3.31	-	-	-
	Os02t0452500-01	33.31	46.95	41.64	21.87	31.03	40.98	-	-	-
	Os02t0534400-01	28.94	46.94	75.52	62.65	46.63	62.02	-	-	-
	Os05t0104200-00	21.52	46.83	34.79	0.94	3.22	4.23	-	-	-
	Os12t0165000-01	38.45	46.79	29.13	24.46	31.33	36.6	-	-	-
	Os01t0767966-00	16.6	46.79	32.39	27.63	42.35	35.98	-	-	-
	Os05t0122800-01	41.22	46.77	30.51	110.23	86.45	46.66	-	-	-
	Os02t0108800-01	9.3	46.74	6.96	2.3	4.88	2.3	-	-	-
	Os07t0480800-01	24.91	46.72	1.64	1.17	5.83	2.38	-	-	-
	Os02t0740500-01	24.35	46.72	84.1	6.74	9.51	44.11	-	-	-
	Os01t0719100-02	32.02	46.7	44.79	70.83	239.24	154.38	-	-	-
	Os12t0143900-01	30.04	46.68	33.06	28.12	33.83	103.97	-	-	-
	Os06t0651100-01	27.42	46.68	9.46	15.99	16.57	3.32	-	-	-
	Os08t0301500-01	35.98	46.64	33.05	37.12	47.46	97.1	-	-	-
	Os02t0557200-01	34.82	46.64	27.48	19.8	42.06	35.99	-	-	-
	Os11t0536400-00	5.17	46.63	76.32	1.37	3.84	27.16	-	-	-
	Os05t0277000-00	10.72	46.63	1.22	0.07	0	0	-	-	-
	Os04t0527400-03	15.19	46.63	62.58	62.53	63.17	26.02	-	-	-
	Os10t0502400-02	28.22	46.62	129.74	126.56	156.98	72.43	-	-	-
	Os07t0538200-01	34.95	46.62	29.81	1.64	4.3	25.68	-	-	-
	Os03t0805400-01	22.09	46.61	85.09	7.84	9.11	48.74	-	-	-
	Os03t0854500-02	32.86	46.58	33.95	37.7	49.35	66.89	-	-	-
	Os01t0176050-00	26.51	46.57	23.36	3.25	3.93	65.67	-	-	-
	Os11t0131100-00	2.45	46.53	35.62	15.56	37.24	5.38	-	-	-
	Os12t0547600-02	23.31	46.52	104.46	8.63	13.27	110.96	-	-	-
	Os02t0740700-01	10	46.52	205.16	7.32	4.02	28.44	-	-	-
	Os08t0448050-00	12.05	46.46	61.12	1.21	4.55	39.77	-	-	-
	Os06t0730300-01	26.81	46.42	54.17	31.71	37.86	69.32	-	-	-
	Os01t0605000-01	27.31	46.41	76.59	8.69	9.37	62.47	-	-	-
	Os03t0857900-04	21.67	46.39	18	50.34	124.03	51.08	-	-	-
	Os08t0545101-00	3.97	46.37	23.19	9.1	19.02	27.27	-	-	-
	Os04t0433600-01	34	46.34	73.44	31.48	47.48	26.97	-	-	-
	Os03t0300801-00	21.34	46.3	30.66	30.58	59.1	15.54	-	-	-
	Os11t0226966-00	14.24	46.27	36.52	17.71	26.84	50.02	-	-	-
	Os10t0463800-01	33.32	46.27	126.27	43.89	64.3	244.41	-	-	-
	Os01t0947000-01	25.79	46.26	73.92	0.07	0.02	3.99	-	-	-
	Os07t0108350-00	7.2	46.25	12.27	118.31	812.01	422.59	-	-	-
	Os01t0589300-01	30	46.25	57.4	31.62	32.25	28.83	-	-	-
	Os01t0138800-01	17.5	46.25	56.05	2.22	2.35	18.59	-	-	-
	Os11t0251400-01	22.77	46.24	21.84	12.61	52.16	117.16	-	-	-
	Os01t0141150-00	26.68	46.19	37.6	27.17	46.83	40.03	-	-	-
	Os03t0854800-02	19.9	46.18	38.97	8.34	34.06	56.84	-	-	-
	Os04t0391500-01	32.5	46.12	65.7	27.31	43.2	20.81	-	-	-
	Os01t0960450-00	20.3	46.09	69.03	14.23	21.17	22.64	-	-	-
	Os01t0957000-01	32.65	46.09	34.26	18.34	24.01	31.19	-	-	-
	Os03t0241300-01	34.46	46.08	28.17	52.64	33.08	31.96	-	-	-
	Os11t0236932-01	33.19	46.06	14.02	4.38	4.37	20.79	-	-	-
	Os06t0663450-00	22.19	46.06	22.58	37.3	55.22	18.91	-	-	-
	Os09t0323000-01	29.69	46.05	26.24	5.53	9.22	18.11	-	-	-
	Os12t0547600-01	28.62	46.01	114.64	11.73	13.99	98.91	-	-	-
	Os01t0919600-01	24.72	45.97	32.64	84.04	86.39	65.41	-	-	-
	Os06t0556000-01	22.98	45.92	21.89	23.84	37.24	36.24	-	-	-
	Os05t0215300-01	37.01	45.92	26.3	33.93	27.14	12.56	-	-	-
	Os01t0841700-01	19.36	45.92	91.2	14.23	9.36	139.06	-	-	-
	Os07t0672600-00	31.68	45.89	19.67	0.42	0.62	0.01	-	-	-
	Os08t0544800-01	23.16	45.87	12.97	32.14	34.26	23	-	-	-
	Os03t0854600-01	25.75	45.83	110.19	5.67	9.27	26.97	-	-	-
	Os03t0762300-01	15.89	45.83	91.54	14.58	15.2	12.69	-	-	-
	Os02t0742000-01	27.06	45.82	40.95	21.25	41.07	87.81	-	-	-
	Os10t0498700-02	40.6	45.81	31.03	26.22	32.98	45.35	-	-	-
	Os01t0259200-02	34.85	45.7	69.07	28.35	28.35	41.24	-	-	-
	Os12t0568500-01	3.64	45.57	72.03	0.1	0.22	0.3	-	-	-
	Os03t0854600-02	26.58	45.57	110.5	5.82	9.28	26.7	-	-	-
	Os03t0326500-01	26.41	45.57	187.32	151.01	25.45	133.63	-	-	-
	Os02t0822050-00	19.38	45.57	55.87	29.94	30.14	45.71	-	-	-
	Os02t0584800-01	13.79	45.57	491.07	167.52	23.63	129.65	-	-	-
	Os08t0536300-01	37.57	45.47	17.5	43.68	49.91	5.2	-	-	-
	Os02t0530300-01	18.89	45.46	58.17	0.92	4.05	5.29	-	-	-
	Os05t0569300-01	27.51	45.44	21.55	18.49	30.37	53.08	-	-	-
	Os05t0101200-01	33.18	45.44	28.27	64.23	77.67	88.27	-	-	-
	Os01t0750300-01	39.38	45.44	10.38	12.15	55.89	1.29	-	-	-
	Os06t0202900-01	18.65	45.43	44.64	31.24	22.04	26.74	-	-	-
	Os02t0437200-01	14.41	45.42	81.42	33.97	30.79	47.76	-	-	-
	Os07t0102400-01	28.58	45.4	22.38	17.77	15.73	46.01	-	-	-
	Os02t0708400-01	40.54	45.38	7.31	10.64	26.78	4.9	-	-	-
	Os02t0802500-02	29.81	45.37	12.11	0.16	0.15	0.56	-	-	-
	Os10t0341700-01	30.64	45.36	18.72	14.85	25	83.31	-	-	-
	Os06t0690200-01	16.33	45.34	54.57	5.18	6.31	25.38	-	-	-
	Os07t0555200-01	24.06	45.22	17.53	3.99	18.59	45.25	-	-	-
	Os04t0196600-01	26.48	45.2	40.09	3.27	3.9	31.01	-	-	-
	Os03t0297000-01	23.14	45.19	71.66	37.75	30.66	47.85	-	-	-
	Os08t0366000-02	19.33	45.14	20.2	79.72	145.53	208.68	-	-	-
	Os01t0787000-01	9.26	45.07	25.23	3.57	2.94	3.69	-	-	-
	Os06t0725900-01	25.81	45.06	25.5	197.51	212.9	246.3	-	-	-
	Os08t0374000-01	33.57	45.05	11.37	120.1	28.76	1.13	-	-	-
	Os02t0643800-01	13.22	44.99	83.51	26.81	47.61	27.35	-	-	-
	Os05t0100600-02	25.32	44.98	44.3	6.04	7.67	59.11	-	-	-
	Os06t0669400-03	29.88	44.97	58.67	641.63	705.97	461.45	-	-	-
	Os07t0484300-01	37.69	44.93	43.17	27.47	31.77	32.07	-	-	-
	Os03t0241400-00	32.48	44.93	27.18	49.78	31.95	31.08	-	-	-
	Os01t0971200-01	35.77	44.93	89.24	100.07	103.63	212.64	-	-	-
	Os07t0558100-00	2.69	44.9	9.7	0.64	1.68	4.47	-	-	-
	Os08t0548700-01	16.75	44.84	16.88	6.62	11.7	7.17	-	-	-
	Os04t0603200-03	16.57	44.73	84.71	98.83	94.96	163.36	-	-	-
[truncated: 63,536 more rows]
